# Supplementary material for: Surgical site infection following surgery for hand trauma: a systematic review and meta-analysis
Source: PubMed Central journal article supplement (PMC10616993; doi:10.1177/17531934231193336), 2023-08-22
Supplement: sj-pdf-1-jhs-10.1177_17531934231193336.pdf [file sj-pdf-1-jhs-10.1177_17531934231193336.pdf]

# Surgical site infection following surgery for hand trauma

## A systematic review and meta-analysis

Wormald JCR, Baldwin AJ, Nadama H, Shaw A, Wade RG, Prieto-Alhambra D, Cook JA, Rodrigues JN, Costa ML

## **Contents**

Online Figure 1. SSI incidence over time

Online Figure 2. Meta-analysis – all included studies

Online Figure 3. Meta-analysis – methodological subgroup analyses

Online Figure 4. Meta-analysis – subgroup analysis by study design

Online Figure 5. Meta-analysis – subgroup analysis by study type

Online Figure 6. Meta-analysis – subgroup analysis by infection definition

Online Figure 7. Meta-analysis – subgroup analysis by risk of bias

Online Figure 8. Meta-analysis – clinical subgroup analyses

Online Figure 9. Meta-analysis – subgroup analysis by injury site

Online Figure 10. Meta-analysis – subgroup analysis by injury type

Online Figure 11. Meta-analysis – subgroup analysis by intervention

Online Figure 12. Meta-analysis – funnel plot

Appendix 1. Search Strategies

Appendix 2 - Abstract Decision Tree

Appendix 3. Meta-regression output

Appendix 4. SRMA R Script

Appendix 5. Full dataset

Appendix 6. References for included studies

Online Table 1 - Characteristics of RCTs

Online Table 2 - Characteristics of Cohort Studies

Online Table 3 - Characteristics of Case Control Studies

Online Table 4 - Characteristics of Case Series

Supplementary figure 1. SSI incidence over time

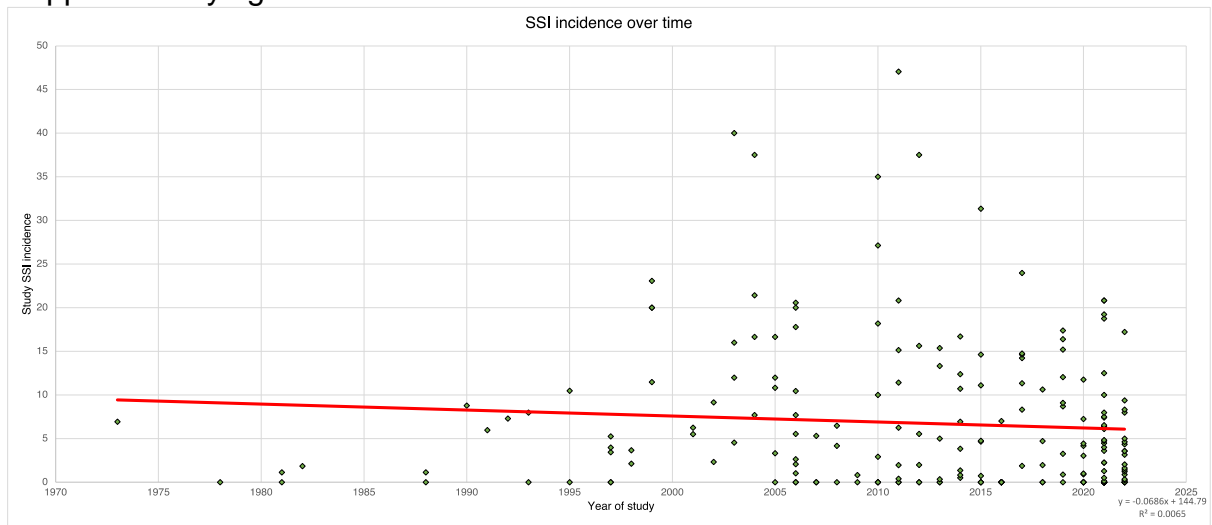

# Supplementary Figure 2. Meta-analysis – all included studies

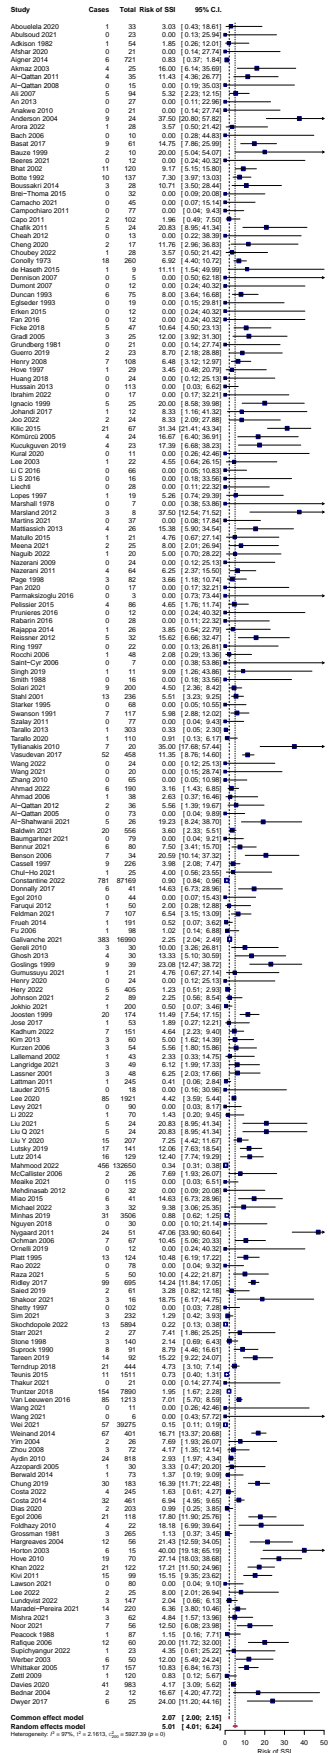

Supplementary Figure 3. Meta-analysis – methodological subgroup analyses

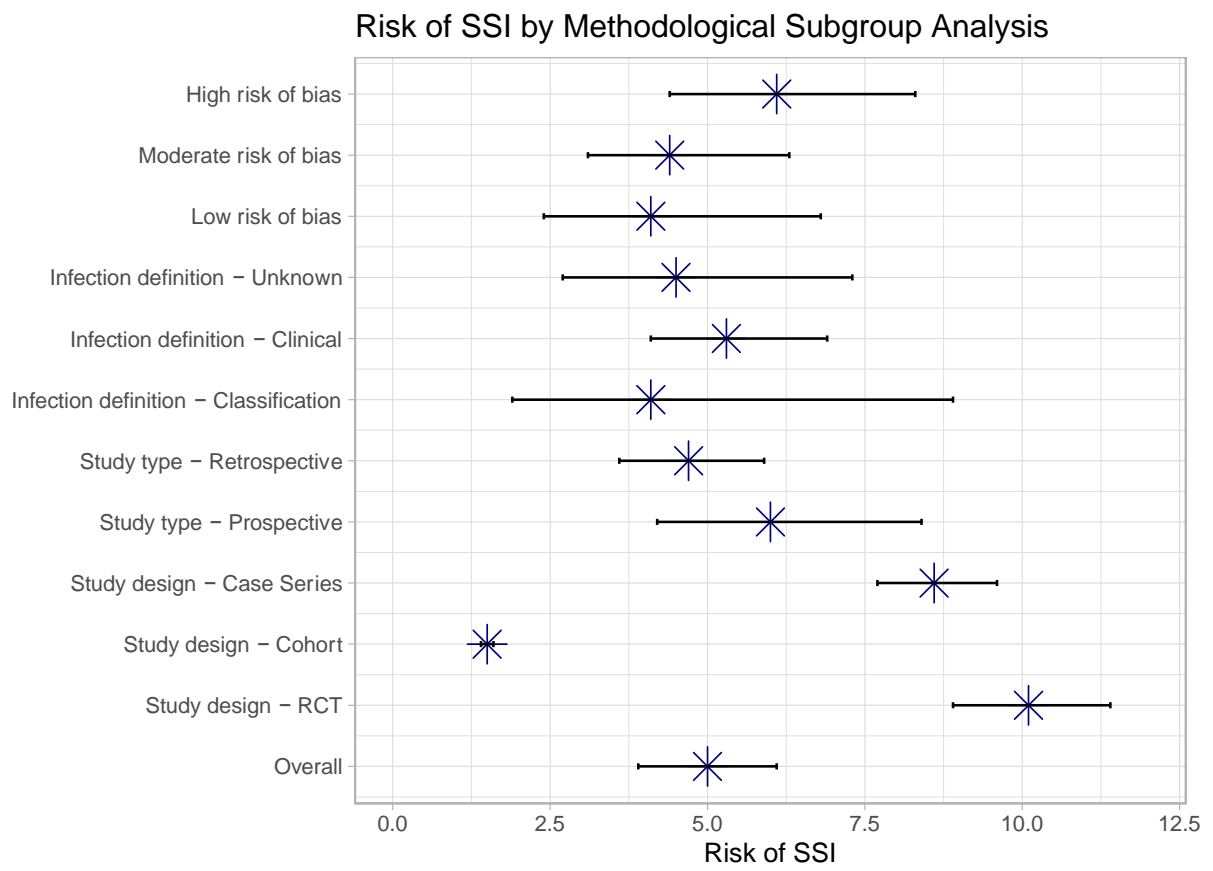

# Supplementary Figure 4. Meta-analysis – subgroup analysis by study design

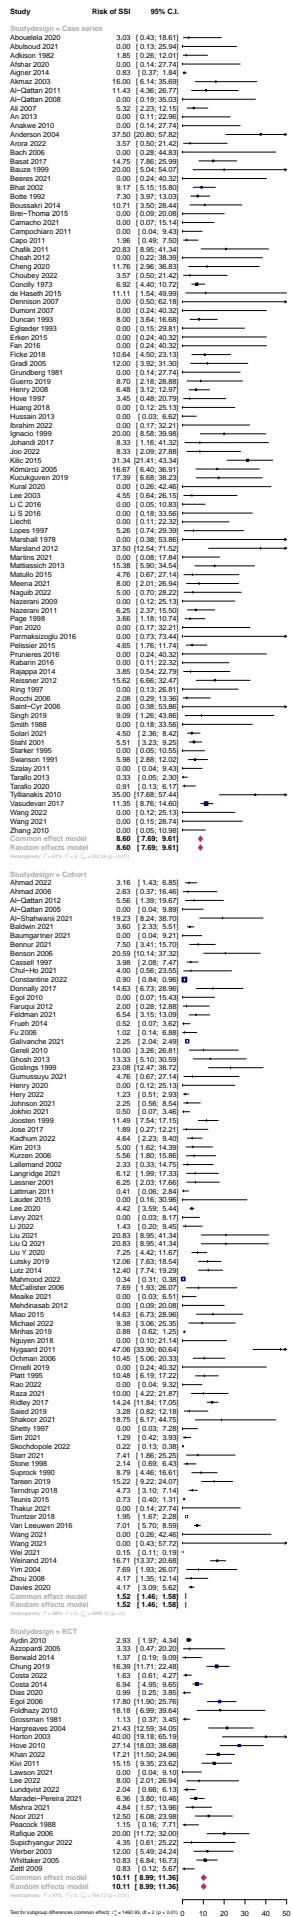

# Supplementary Figure 5. Meta-analysis – subgroup analysis by study type

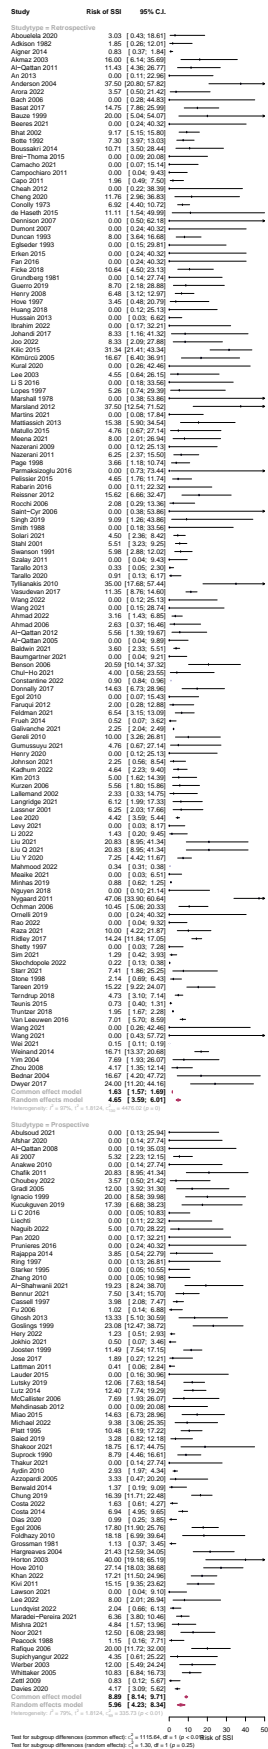

# Supplementary Figure 6. Meta-analysis – subgroup analysis by infection definition

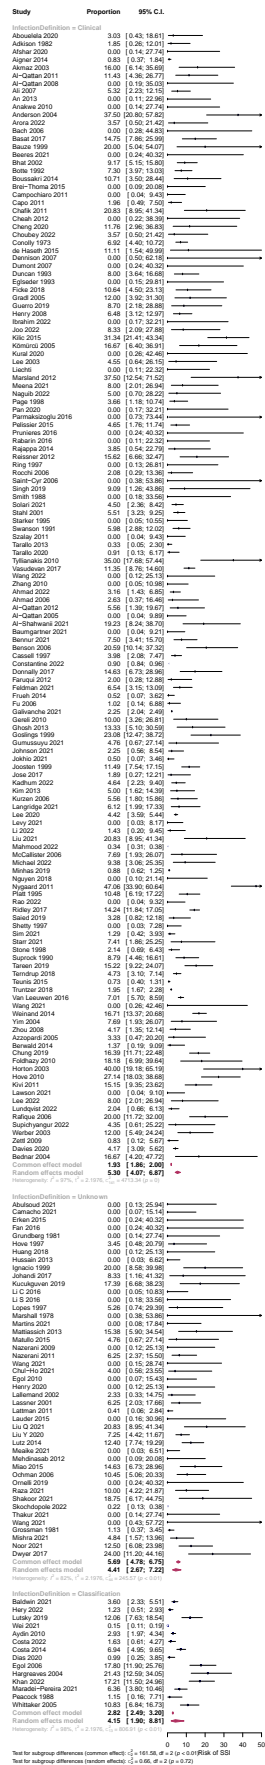



# Supplementary Figure 7. Meta-analysis – subgroup analysis by risk of bias

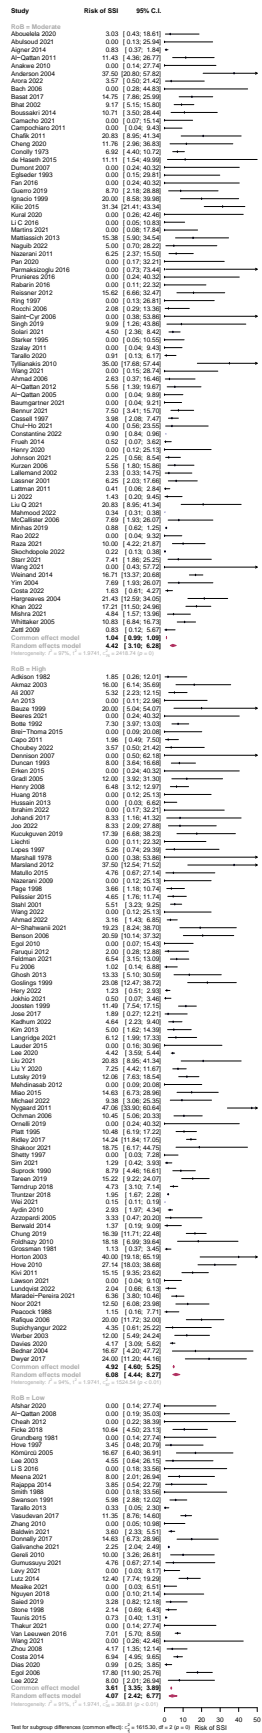

Supplementary Figure 8. Meta-analysis – clinical subgroup analyses

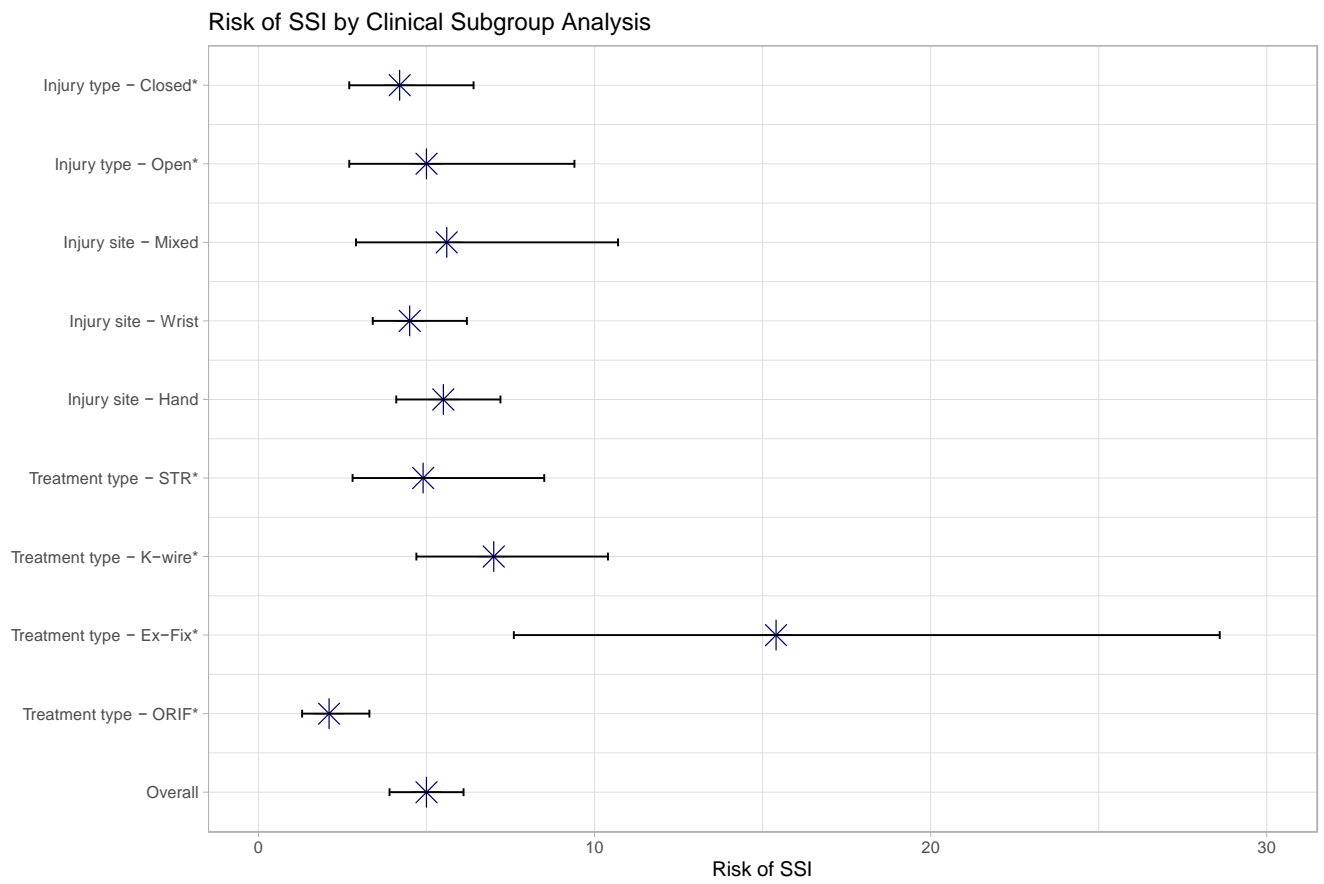

# Supplementary Figure 9. Meta-analysis – subgroup analysis by injury site

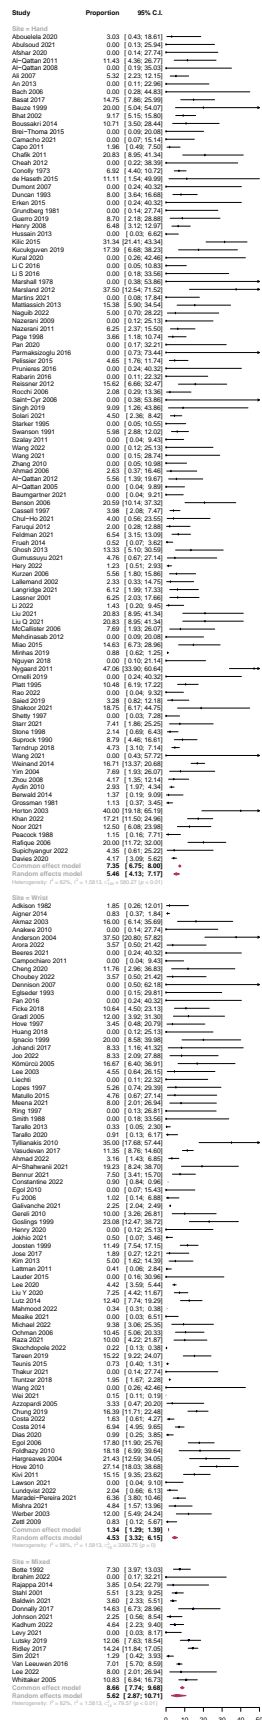

Test for subgroup differences (common effect):  $\chi^2 = 188.00$ ,  $df = 2$ ,  $p < 0.001$ , Risk of Bias

Test for subgroup differences (random effect):  $\chi^2 = 0.88$ ,  $df = 2$ ,  $p = 0.64$

## Supplementary Figure 10. Meta-analysis – subgroup analysis by injury type

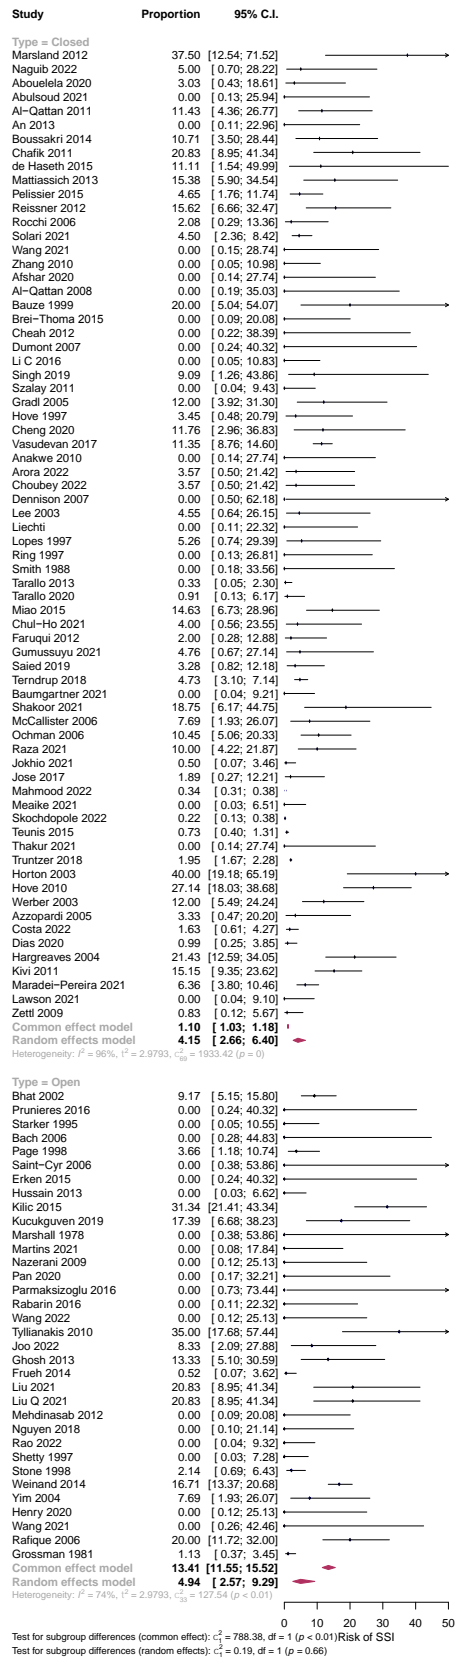

## Supplementary Figure 11. Meta-analysis – subgroup analysis by intervention

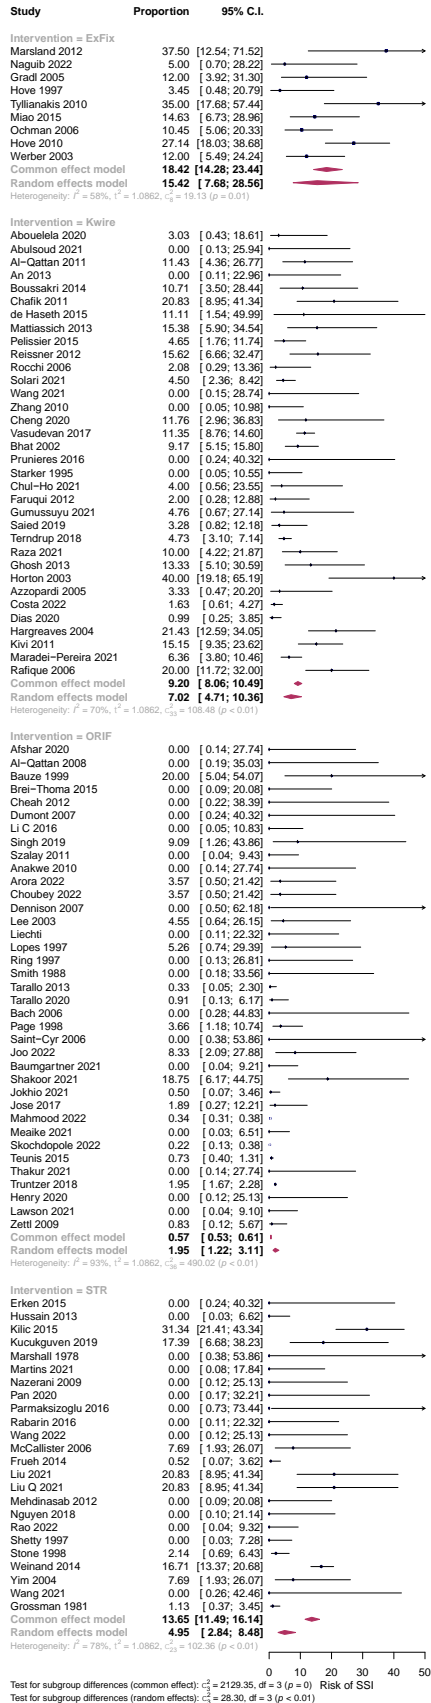

Supplementary Figure 12. Meta-analysis – funnel plot

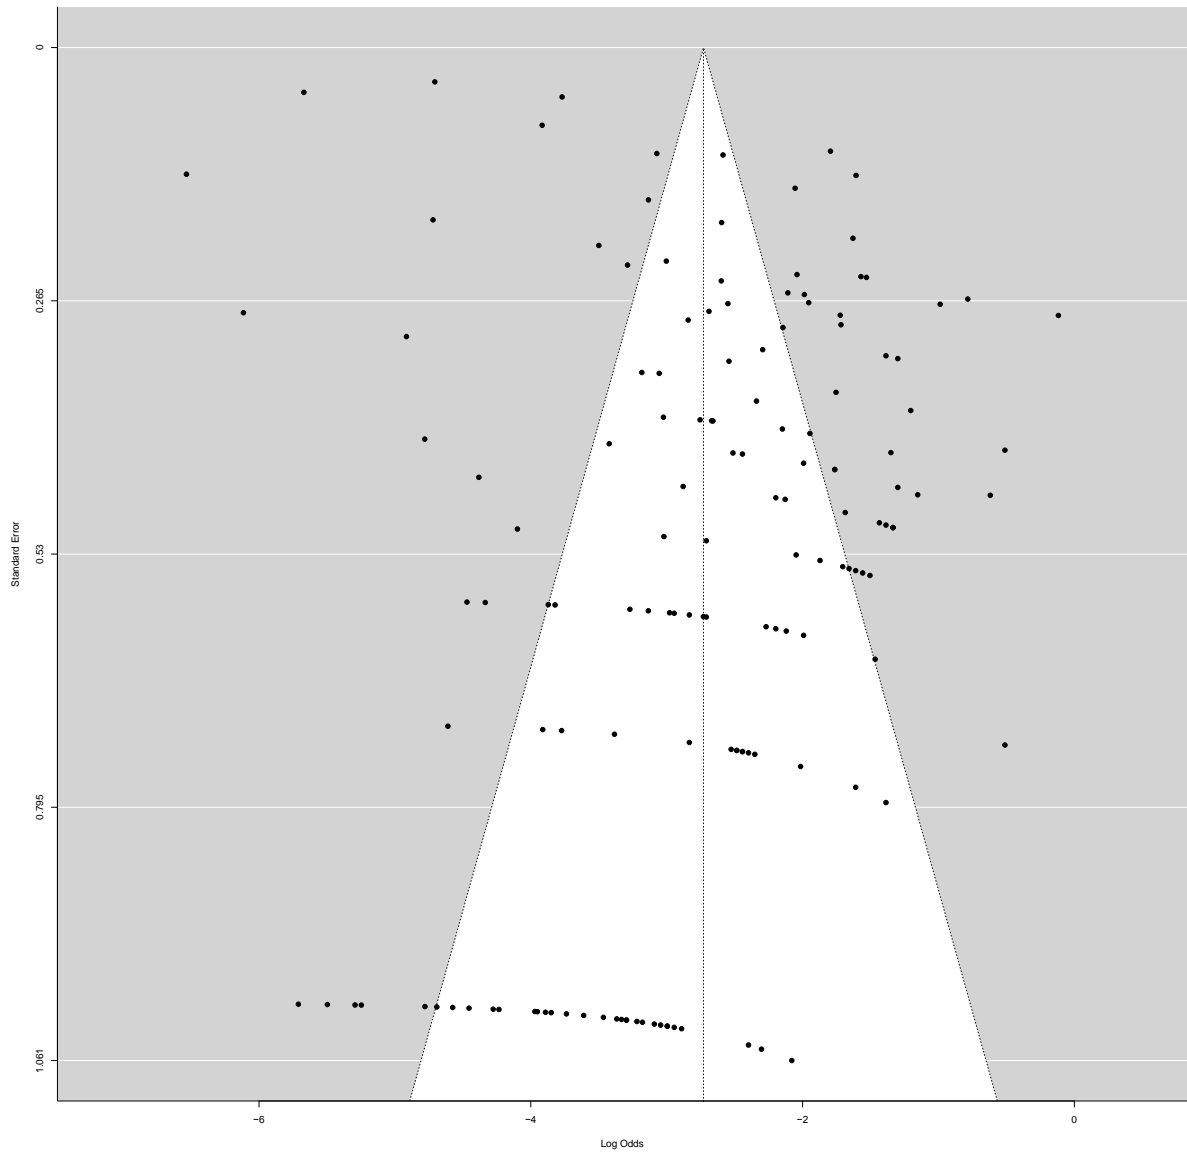

## Supplementary File 1 - Search Strategies

Search Name: Hand trauma SSI

Date Run: 16/08/2021 14:21:06

Comment:

| ID | Search    | Hits  |
|----|-----------|-------|
| #1 | hand      | 36217 |
| #2 | trauma    | 20149 |
| #3 | injury    | 53872 |
| #4 | infection | 98211 |
| #5 | #2 OR #3  | 66688 |
| #6 | #1 and #5 | 3624  |
| #7 | #4 and #6 | 857   |

Strategy 1063692/285

[See full search strategy](#)

| #   | Database | Search term                                                                                                                                                                                                                                                                                                                                                                                                                                                                                                                                                                                                                                                                                                                                  | Results |
|-----|----------|----------------------------------------------------------------------------------------------------------------------------------------------------------------------------------------------------------------------------------------------------------------------------------------------------------------------------------------------------------------------------------------------------------------------------------------------------------------------------------------------------------------------------------------------------------------------------------------------------------------------------------------------------------------------------------------------------------------------------------------------|---------|
| 285 | CINAHL   | (infect*).ti,ab AND (((hand*).ti,ab OR (finger*).ti,ab OR (thumb*).ti,ab OR (wrist*).ti,ab OR (phalang*).ti,ab OR (metacarpal*).ti,ab OR (carpal*).ti,ab OR (radius*).ti,ab OR (ulna*).ti,ab) AND ((nerve*).ti,ab OR (neuro*).ti,ab OR (vasc*).ti,ab OR (arter*).ti,ab OR (vessel*).ti,ab OR (tendon*).ti,ab OR (ligament*).ti,ab OR (joint*).ti,ab OR (capsul*).ti,ab OR (volar*).ti,ab OR (musc*).ti,ab)) AND ((trauma*).ti,ab OR (injur*).ti,ab OR (lacerat*).ti,ab OR (fracture*).ti,ab OR (crush*).ti,ab OR (wound*).ti,ab)) AND ((surg*).ti,ab OR (operati*).ti,ab OR (intervent*).ti,ab OR (procedur*).ti,ab OR (repair*).ti,ab OR (fix*).ti,ab OR (reconstruct*).ti,ab OR (debride*).ti,ab OR (closur*).ti,ab OR (dressing*).ti,ab)) | 490     |

**Contents** 50 of 490 results on CINAHL - (infect\*).ti,ab AND (((hand\*).ti,ab OR (finger\*).ti,ab OR (thumb\*).ti,ab OR (wrist\*).ti,ab OR (phalang\*).ti,ab OR (metacarpal\*).ti,ab OR (carpal\*).ti,ab OR (radius\*).ti,ab OR (ulna\*).ti,ab) AND ((nerve\*).ti,ab OR (neuro\*).ti,ab OR (vasc\*).ti,ab OR (arter\*).ti,ab OR (vessel\*).ti,ab OR (tendon\*).ti,ab OR (ligament\*).ti,ab OR (joint\*).ti,ab OR (capsul\*).ti,ab OR (volar\*).ti,ab OR (musc\*).ti,ab)) AND ((trauma\*).ti,ab OR (injur\*).ti,ab OR (lacerat\*).ti,ab OR (fracture\*).ti,ab OR (crush\*).ti,ab OR (wound\*).ti,ab)) AND ((surg\*).ti,ab OR (operati\*).ti,ab OR (intervent\*).ti,ab OR (procedur\*).ti,ab OR (repair\*).ti,ab OR (fix\*).ti,ab OR (reconstruct\*).ti,ab OR (debride\*).ti,ab OR (closur\*).ti,ab OR (dressing\*).ti,ab))

|                                                                                                                                                                    |         |
|--------------------------------------------------------------------------------------------------------------------------------------------------------------------|---------|
| 1. Allograft Interposition Bone Graft for First Metatarsal Phalangeal Arthrodesis: Salvage After Bone Loss and Shortening of the First Ray.....                    | Page 4  |
| 2. Clinical efficacy of closed reduction and percutaneous parallel K-wire interlocking fixation of first metacarpal base fracture.....                             | Page 4  |
| 3. A Practical Approach to the Management of Digital Ulcers in Patients With Systemic Sclerosis: A Narrative Review.....                                           | Page 5  |
| 4. Inclusion of Olecranon Osteotomy With the Posterior Approach for Fixation of Distal Humerus Fractures (OTA/AO 13) Does Not Increase Surgical Complications..... | Page 6  |
| 5. Antegrade intramedullary fixation for adolescent fifth metacarpal neck fracture and its impact on epiphyseal growth. ....                                       | Page 7  |
| 6. Comparison of lateral entry and crossed entry pinning for pediatric supracondylar humeral fractures: a meta-analysis of randomized controlled trials. ....      | Page 7  |
| 7. Open total dislocation of ankle joint without fractures: A case report. ....                                                                                    | Page 8  |
| 8. A review of the Turned-down Onto Pericapsular-tissue Hemisectioned Amputated Toe (TOPHAT) flap for wound coverage during ray amputations of the toes.....       | Page 9  |
| 9. High Rates of Spacer Fracture in the Setting of Extended Trochanteric Osteotomy With a Specific Thin-Core Articulating Antibiotic Hip Spacer. ....              | Page 9  |
| 10. Technique and Outcomes of Hand-Assist Laparoscopic Continent Cutaneous Ileocecostoplasty. ....                                                                 | Page 10 |



**Strategy** 977736/60

[See full search strategy](#)

| #  | Database | Search term                                                                                                                                                                                                                                                                                                                                                                                                                                                                                                                                                                                                                                                                                                                                                                                                                                                                                                                                                                                                                                                                                                                                                                                                                                                                                                                                                                                                                                        | Results |
|----|----------|----------------------------------------------------------------------------------------------------------------------------------------------------------------------------------------------------------------------------------------------------------------------------------------------------------------------------------------------------------------------------------------------------------------------------------------------------------------------------------------------------------------------------------------------------------------------------------------------------------------------------------------------------------------------------------------------------------------------------------------------------------------------------------------------------------------------------------------------------------------------------------------------------------------------------------------------------------------------------------------------------------------------------------------------------------------------------------------------------------------------------------------------------------------------------------------------------------------------------------------------------------------------------------------------------------------------------------------------------------------------------------------------------------------------------------------------------|---------|
| 60 | Medline  | ((exp "METACARPAL BONES"/ OR exp "FINGER PHALANGES"/ OR exp "CARPAL BONES"/ OR exp "HAND BONES"/ OR exp METACARPUS/ OR exp FINGERS/ OR exp HAND/ OR exp "METACARPOPHALANGEAL JOINT"/ OR exp "FINGER JOINT"/ OR exp "CARPOMETACARPAL JOINTS"/ OR exp "CARPAL JOINTS"/ OR exp "HAND JOINTS"/ OR exp WRIST/ OR exp "WRIST JOINT"/) AND (exp "FINGER INJURIES"/ OR exp "HAND INJURIES"/ OR exp "WRIST INJURIES"/ OR exp "ACCIDENTAL INJURIES"/ OR exp "WOUNDS AND INJURIES"/ OR exp "WOUNDS, PENETRATING"/ OR exp "WOUNDS, NONPENETRATING"/ OR exp "VASCULAR SYSTEM INJURIES"/ OR exp "TRAUMA, NERVOUS SYSTEM"/ OR exp "TENDON INJURIES"/ OR exp "SURGICAL WOUND"/ OR exp "SOFT TISSUE INJURIES"/ OR exp REINJURIES/ OR exp "MULTIPLE TRAUMA"/ OR exp LACERATIONS/ OR exp "JOINT DISLOCATIONS"/ OR exp "HAND INJURIES"/ OR exp "FRACTURES, CARTILAGE"/ OR exp "FRACTURES, BONE"/ OR exp "FOREIGN BODIES"/ OR exp "CRUSH INJURIES"/ OR exp "ATHLETIC INJURIES"/ OR exp "ARM INJURIES"/ OR exp "AMPUTATION, TRAUMATIC"/) AND (exp "GRAM-POSITIVE BACTERIAL INFECTIONS"/ OR exp "GRAM-NEGATIVE BACTERIAL INFECTIONS"/ OR exp "BACTERIAL INFECTIONS"/ OR exp "STAPHYLOCOCCAL INFECTIONS"/ OR exp INFECTIONS/ OR exp "WOUND INFECTION"/ OR exp TOXEMIA/ OR exp "SOFT TISSUE INFECTIONS"/ OR exp "SKIN DISEASES, INFECTIOUS"/ OR exp SEPSIS/ OR exp "BONE DISEASES, INFECTIOUS"/ OR exp "BACTERIAL INFECTIONS AND MYCOSES"/ OR exp "ARTHRITIS, INFECTIOUS"/) | 1061    |

**Contents** 50 of 1061 results on Medline - ((exp "METACARPAL BONES"/ OR exp "FINGER PHALANGES"/ OR exp "CARPAL BONES"/ OR exp "HAND BONES"/ OR exp METACARPUS/ OR exp FINGERS/ OR exp HAND/ OR exp "METACARPOPHALANGEAL JOINT"/ OR exp "FINGER JOINT"/ OR exp "CARPOMETACARPAL JOINTS"/ OR exp "CARPAL JOINTS"/ OR exp "HAND JOINTS"/ OR exp WRIST/ OR exp "WRIST JOINT"/) AND (exp "FINGER INJURIES"/ OR exp "HAND INJURIES"/ OR exp "WRIST INJURIES"/ OR exp "ACCIDENTAL INJURIES"/ OR exp "WOUNDS AND INJURIES"/ OR exp "WOUNDS, PENETRATING"/ OR exp "WOUNDS, NONPENETRATING"/ OR exp "VASCULAR SYSTEM INJURIES"/ OR exp "TRAUMA, NERVOUS SYSTEM"/ OR exp "TENDON INJURIES"/ OR exp "SURGICAL WOUND"/ OR exp "SOFT TISSUE INJURIES"/ OR exp REINJURIES/ OR exp "MULTIPLE TRAUMA"/ OR exp LACERATIONS/ OR exp "JOINT DISLOCATIONS"/ OR exp "HAND INJURIES"/ OR exp "FRACTURES, CARTILAGE"/ OR exp "FRACTURES, BONE"/ OR exp "FOREIGN BODIES"/ OR exp "CRUSH INJURIES"/ OR exp "ATHLETIC INJURIES"/ OR exp "ARM INJURIES"/ OR exp "AMPUTATION, TRAUMATIC"/) AND (exp "GRAM-POSITIVE BACTERIAL INFECTIONS"/ OR exp "GRAM-NEGATIVE BACTERIAL INFECTIONS"/ OR exp

**Strategy** 974100/49

[See full search strategy](#)

| #  | Database | Search term                                                                                                                                                                                                                                                                                                                                                                                                                                                                                                                                                                                                                                                                                                                                                                                                                                                                                                                                                                                                                                                       | Results |
|----|----------|-------------------------------------------------------------------------------------------------------------------------------------------------------------------------------------------------------------------------------------------------------------------------------------------------------------------------------------------------------------------------------------------------------------------------------------------------------------------------------------------------------------------------------------------------------------------------------------------------------------------------------------------------------------------------------------------------------------------------------------------------------------------------------------------------------------------------------------------------------------------------------------------------------------------------------------------------------------------------------------------------------------------------------------------------------------------|---------|
| 49 | EMBASE   | ((exp HAND/ OR exp WRIST/ OR exp FINGER/ OR exp THUMB/) AND (exp "ACCIDENTAL INJURY"/ OR exp "BATTLE INJURY"/ OR exp "BLOOD VESSEL INJURY"/ OR exp "BLUNT TRAUMA"/ OR exp "CRUSH TRAUMA"/ OR exp "LIMB INJURY"/ OR exp "NERVOUS SYSTEM INJURY"/ OR exp "MUSCULOSKELETAL INJURY"/ OR exp "SKIN INJURY"/ OR exp "SOFT TISSUE INJURY"/ OR exp "SPORT INJURY"/ OR exp "SURGICAL INJURY"/ OR exp "TISSUE INJURY"/ OR exp "TRAUMATIC AMPUTATION"/ OR exp WOUND/ OR exp INJURY)) AND (exp "INFECTION BURDEN"/ OR exp SUPPURATION/ OR exp "SOFT TISSUE INFECTION"/ OR exp "SKIN INFECTION"/ OR exp SEPSIS/ OR exp PUS/ OR exp "PRIMARY INFECTION"/ OR exp "PERSISTENT INFECTION"/ OR exp "MUSCULOSKELETAL INFECTION"/ OR exp "INFECTIONS ASSOCIATED WITH OTHER INFECTIONS OR CONDITIONS"/ OR exp "INFECTION RATE"/ OR exp "INFECTION COMPLICATION"/ OR exp "HOSPITAL INFECTION"/ OR exp "HEALTHCARE ASSOCIATED INFECTION"/ OR exp "HAND INFECTION"/ OR exp "GRAFT INFECTION"/ OR exp "DEVICE INFECTION"/ OR exp "BACTERIAL INFECTION"/ OR exp ABSCESS/ OR exp INFECTION/) | 2551    |

**Contents** 50 of 2551 results on EMBASE - ((exp HAND/ OR exp WRIST/ OR exp FINGER/ OR exp THUMB/) AND (exp "ACCIDENTAL INJURY"/ OR exp "BATTLE INJURY"/ OR exp "BLOOD VESSEL INJURY"/ OR exp "BLUNT TRAUMA"/ OR exp "CRUSH TRAUMA"/ OR exp "LIMB INJURY"/ OR exp "NERVOUS SYSTEM INJURY"/ OR exp "MUSCULOSKELETAL INJURY"/ OR exp "SKIN INJURY"/ OR exp "SOFT TISSUE INJURY"/ OR exp "SPORT INJURY"/ OR exp "SURGICAL INJURY"/ OR exp "TISSUE INJURY"/ OR exp "TRAUMATIC AMPUTATION"/ OR exp WOUND/ OR exp INJURY)) AND (exp "INFECTION BURDEN"/ OR exp SUPPURATION/ OR exp "SOFT TISSUE INFECTION"/ OR exp "SKIN INFECTION"/ OR exp SEPSIS/ OR exp PUS/ OR exp "PRIMARY INFECTION"/ OR exp "PERSISTENT INFECTION"/ OR exp "MUSCULOSKELETAL INFECTION"/ OR exp "INFECTIONS ASSOCIATED WITH OTHER INFECTIONS OR CONDITIONS"/ OR exp "INFECTION RATE"/ OR exp "INFECTION COMPLICATION"/ OR exp "HOSPITAL INFECTION"/ OR exp "HEALTHCARE ASSOCIATED INFECTION"/ OR exp "HAND INFECTION"/ OR exp "GRAFT INFECTION"/ OR exp "DEVICE INFECTION"/ OR exp "BACTERIAL INFECTION"/ OR exp ABSCESS/ OR exp INFECTION/)

|                                                                                                                              |        |
|------------------------------------------------------------------------------------------------------------------------------|--------|
| 1. 24960 Botryomycosis in an immunocompromised adult male.....                                                               | Page 4 |
| 2. 25959 Clinical and histopathologic evolution of inflammatory linear verrucous epidermal nevus in a pediatric patient..... | Page 4 |
| 3. 27910 A sporotrichoid rash in a landscaper and fish owner.....                                                            | Page 5 |
| 4. Incident bone fracture and mortality in a large HIV cohort outpatient study, 2000-2017, USA.....                          | Page 6 |

**Strategy** 970556/81

[See full search strategy](#)

| #  | Database | Search term                                                                                                                                                                                                                                                                                                                                                                                                                                                                                                                                                                                                                                                                                                                                  | Results |
|----|----------|----------------------------------------------------------------------------------------------------------------------------------------------------------------------------------------------------------------------------------------------------------------------------------------------------------------------------------------------------------------------------------------------------------------------------------------------------------------------------------------------------------------------------------------------------------------------------------------------------------------------------------------------------------------------------------------------------------------------------------------------|---------|
| 81 | EMBASE   | (infect*).ti,ab AND (((hand*).ti,ab OR (finger*).ti,ab OR (thumb*).ti,ab OR (wrist*).ti,ab OR (phalang*).ti,ab OR (metacarpal*).ti,ab OR (carpal*).ti,ab OR (radius*).ti,ab OR (ulna*).ti,ab) AND ((nerve*).ti,ab OR (neuro*).ti,ab OR (vasc*).ti,ab OR (arter*).ti,ab OR (vessel*).ti,ab OR (tendon*).ti,ab OR (ligament*).ti,ab OR (joint*).ti,ab OR (capsul*).ti,ab OR (volar*).ti,ab OR (musc*).ti,ab)) AND ((trauma*).ti,ab OR (injur*).ti,ab OR (lacerat*).ti,ab OR (fracture*).ti,ab OR (crush*).ti,ab OR (wound*).ti,ab)) AND ((surg*).ti,ab OR (operati*).ti,ab OR (intervent*).ti,ab OR (procedur*).ti,ab OR (repair*).ti,ab OR (fix*).ti,ab OR (reconstruct*).ti,ab OR (debride*).ti,ab OR (closur*).ti,ab OR (dressing*).ti,ab)) | 3367    |

**Contents** 50 of 3367 results on EMBASE - (infect\*).ti,ab AND (((hand\*).ti,ab OR (finger\*).ti,ab OR (thumb\*).ti,ab OR (wrist\*).ti,ab OR (phalang\*).ti,ab OR (metacarpal\*).ti,ab OR (carpal\*).ti,ab OR (radius\*).ti,ab OR (ulna\*).ti,ab) AND ((nerve\*).ti,ab OR (neuro\*).ti,ab OR (vasc\*).ti,ab OR (arter\*).ti,ab OR (vessel\*).ti,ab OR (tendon\*).ti,ab OR (ligament\*).ti,ab OR (joint\*).ti,ab OR (capsul\*).ti,ab OR (volar\*).ti,ab OR (musc\*).ti,ab)) AND ((trauma\*).ti,ab OR (injur\*).ti,ab OR (lacerat\*).ti,ab OR (fracture\*).ti,ab OR (crush\*).ti,ab OR (wound\*).ti,ab)) AND ((surg\*).ti,ab OR (operati\*).ti,ab OR (intervent\*).ti,ab OR (procedur\*).ti,ab OR (repair\*).ti,ab OR (fix\*).ti,ab OR (reconstruct\*).ti,ab OR (debride\*).ti,ab OR (closur\*).ti,ab OR (dressing\*).ti,ab))

|                                                                                                                                                                                    |         |
|------------------------------------------------------------------------------------------------------------------------------------------------------------------------------------|---------|
| 1. Mini-invasive Osteotomy for Pediatric Distal Radius Malunion .....                                                                                                              | Page 4  |
| 2. Allograft Interposition Bone Graft for First Metatarsal Phalangeal Arthrodesis: Salvage After Bone Loss and Shortening of the First Ray .....                                   | Page 4  |
| 3. Robotic Kidney Transplant: The Modern Era Technical Revolution.....                                                                                                             | Page 5  |
| 4. Non traumatic, single channel, low flow peroneal arteriovenous fistula leading to toe gangrene: An extremely rare observation.....                                              | Page 5  |
| 5. A Practical Approach to the Management of Digital Ulcers in Patients with Systemic Sclerosis: A Narrative Review.....                                                           | Page 6  |
| 6. Top 20 Research Studies of 2020 for Primary Care Physicians.....                                                                                                                | Page 7  |
| 7. One-stage Distal Interphalangeal Joint Fusion With External Fixator for the Treatment of Septic Joint Arthritis.....                                                            | Page 8  |
| 8. Vascularised fibular graft in the management of non-union of fracture shaft of radius: a less ventured entity .....                                                             | Page 8  |
| 9. Upper extremity Histoplasma capsulatum treatment with isavuconazole.....                                                                                                        | Page 8  |
| 10. Long-term results after modified Burton-Pellegrini's technique in 24 cases affected by advanced rhizarthrosis .....                                                            | Page 9  |
| 11. Efficacy of 2-stage revision using a prosthesis of antibiotic-loaded acrylic cement spacer with or without cortical strut allograft in infected total elbow arthroplasty ..... | Page 10 |
| 12. Hemiarthroplastik der Hufte uber den direkten anterioren ZugangHemiarthroplasty of the hip using the direct anterior approach.....                                             | Page 11 |

**Strategy** 970556/242

[See full search strategy](#)

| #   | Database | Search term                                                                                                                                                                                                                                                                                                                                                                                                                                                                                                                                                                                                                                                                                                                                  | Results |
|-----|----------|----------------------------------------------------------------------------------------------------------------------------------------------------------------------------------------------------------------------------------------------------------------------------------------------------------------------------------------------------------------------------------------------------------------------------------------------------------------------------------------------------------------------------------------------------------------------------------------------------------------------------------------------------------------------------------------------------------------------------------------------|---------|
| 242 | Medline  | (infect*).ti,ab AND (((hand*).ti,ab OR (finger*).ti,ab OR (thumb*).ti,ab OR (wrist*).ti,ab OR (phalang*).ti,ab OR (metacarpal*).ti,ab OR (carpal*).ti,ab OR (radius*).ti,ab OR (ulna*).ti,ab) AND ((nerve*).ti,ab OR (neuro*).ti,ab OR (vasc*).ti,ab OR (arter*).ti,ab OR (vessel*).ti,ab OR (tendon*).ti,ab OR (ligament*).ti,ab OR (joint*).ti,ab OR (capsul*).ti,ab OR (volar*).ti,ab OR (musc*).ti,ab)) AND ((trauma*).ti,ab OR (injur*).ti,ab OR (lacerat*).ti,ab OR (fracture*).ti,ab OR (crush*).ti,ab OR (wound*).ti,ab)) AND ((surg*).ti,ab OR (operati*).ti,ab OR (intervent*).ti,ab OR (procedur*).ti,ab OR (repair*).ti,ab OR (fix*).ti,ab OR (reconstruct*).ti,ab OR (debride*).ti,ab OR (closur*).ti,ab OR (dressing*).ti,ab)) | 2014    |

**Contents** 50 of 2014 results on Medline - (infect\*).ti,ab AND (((hand\*).ti,ab OR (finger\*).ti,ab OR (thumb\*).ti,ab OR (wrist\*).ti,ab OR (phalang\*).ti,ab OR (metacarpal\*).ti,ab OR (carpal\*).ti,ab OR (radius\*).ti,ab OR (ulna\*).ti,ab) AND ((nerve\*).ti,ab OR (neuro\*).ti,ab OR (vasc\*).ti,ab OR (arter\*).ti,ab OR (vessel\*).ti,ab OR (tendon\*).ti,ab OR (ligament\*).ti,ab OR (joint\*).ti,ab OR (capsul\*).ti,ab OR (volar\*).ti,ab OR (musc\*).ti,ab)) AND ((trauma\*).ti,ab OR (injur\*).ti,ab OR (lacerat\*).ti,ab OR (fracture\*).ti,ab OR (crush\*).ti,ab OR (wound\*).ti,ab)) AND ((surg\*).ti,ab OR (operati\*).ti,ab OR (intervent\*).ti,ab OR (procedur\*).ti,ab OR (repair\*).ti,ab OR (fix\*).ti,ab OR (reconstruct\*).ti,ab OR (debride\*).ti,ab OR (closur\*).ti,ab OR (dressing\*).ti,ab))

|                                                                                                                                                                                  |         |
|----------------------------------------------------------------------------------------------------------------------------------------------------------------------------------|---------|
| 1. [Clinical effects of ulnar artery perforator chain flaps in repairing wounds on distal forearm or wrist with vascular anastomosis].                                           | Page 4  |
| 2. [Wound repair and functional reconstruction of high-voltage electrical burns in wrists].                                                                                      | Page 5  |
| 3. [The pedicled groin flap for defect closure of the hand].                                                                                                                     | Page 5  |
| 4. Complications associated with volar locking plate fixation for distal radius fractures in 1955 cases: A multicentre retrospective study.                                      | Page 6  |
| 5. [Kirschner wire fixation in three joints combined with bone anchor repair for treatment of acute perilunate injury].                                                          | Page 7  |
| 6. Volar plate fixation for the treatment of distal radius fractures: analysis of adverse events.                                                                                | Page 8  |
| 7. [Clinical application of free peroneal perforator-based sural neurofasciocutaneous flap].                                                                                     | Page 9  |
| 8. Role of a spanning plate as an internal fixator in complex distal radius fractures.                                                                                           | Page 9  |
| 9. Indications and functional outcome of the use of integra® dermal regeneration template for the management of traumatic soft tissue defects on dorsal hand, fingers and thumb. | Page 10 |
| 10. [Vascularised Fibula and Tendon Transfer in the Comprehensive Treatment of Forearm Fracture with Gas Gangrene Complication].                                                 | Page 11 |
| 11. [Mini locked-plate trans-carpometacarpal joint internal fixation for treating comminuted fracture of base of the fifth metacarpal].                                          | Page 11 |

Supplementary File 2 - Abstract Decision Tree

| Step | Criteria                                                                                                                                                                                                                                                                                                                                                                                                                                                                                                                                                                                                                           | Decision                                        |
|------|------------------------------------------------------------------------------------------------------------------------------------------------------------------------------------------------------------------------------------------------------------------------------------------------------------------------------------------------------------------------------------------------------------------------------------------------------------------------------------------------------------------------------------------------------------------------------------------------------------------------------------|-------------------------------------------------|
| 1    | Is it a primary clinical study of human participants?                                                                                                                                                                                                                                                                                                                                                                                                                                                                                                                                                                              | Yes - move to step 2<br>No - exclude            |
| 2    | Is it a study of surgery for acute hand or wrist injuries?<br><br>Acute defined as surgery within 4 weeks of injury                                                                                                                                                                                                                                                                                                                                                                                                                                                                                                                | Yes - move to step 3<br>No - exclude            |
| 3    | Does the study report infection as an outcome?                                                                                                                                                                                                                                                                                                                                                                                                                                                                                                                                                                                     | Yes - move to step 4<br>No - exclude            |
| 4    | Confirm that the study reports infection following surgery for acute hand/wrist injury                                                                                                                                                                                                                                                                                                                                                                                                                                                                                                                                             | Yes - include, extract data<br>No - revisit 1-3 |
| 5    | <p>Extract the following data:</p> <ul style="list-style-type: none"> <li>• Author</li> <li>• Year</li> <li>• Study design (case series, case control, cohort, RCT)</li> <li>• Study type (retrospective or prospective)</li> <li>• Total study participants</li> <li>• Total surgical participants</li> <li>• Injury site (hand, wrist, mixed)</li> <li>• Injury type (open, closed, mixed)</li> <li>• Treatment type (soft tissue reconstruction, external fixation, K-wire, ORIF, mixed)</li> <li>• Number of infections in surgical participants</li> <li>• Infection diagnosis (classification, clinical, unknown)</li> </ul> |                                                 |

### Supplementary File 3. Meta-regression output

#### #Meta-regression

```
metareg.moderator=rma(yi, vi, data=ies.logit, mods=~Site)
metareg.moderator=rma(yi, vi, data=ies.logit, mods=~RoB)
metareg.moderator=rma(yi, vi, data=ies.logit, mods=~Intervention)
metareg.moderator=rma(yi, vi, data=ies.logit, mods=~Studytype)
metareg.moderator=rma(yi, vi, data=ies.logit, mods=~Studydesign)
metareg.moderator=rma(yi, vi, data=ies.logit, mods=~InfectionDefinition)

metareg.moderators=rma(yi, vi, data=ies.logit,

mods=~Site+Type+Intervention+RoB+Studytype+InfectionDefinition+Studydesign)

metareg.moderators$beta <- exp(metareg.moderators$beta)
metareg.moderators$ci.ub <- exp(metareg.moderators$ci.ub)
metareg.moderators$ci.lb <- exp(metareg.moderators$ci.lb)
print(metareg.moderators) #oddsratios
```

### Multivariate meta-regression (no test for collinearity) ###

# Mixed-Effects Model (k = 146; tau<sup>2</sup> estimator: REML)

```
# tau^2 (estimated amount of residual heterogeneity): 0.9027 (SE = 0.1489)
# tau (square root of estimated tau^2 value): 0.9501
# I^2 (residual heterogeneity / unaccounted variability): 89.49%
# H^2 (unaccounted variability / sampling variability): 9.51
# R^2 (amount of heterogeneity accounted for): 28.19%
#
# Test for Residual Heterogeneity:
# QE(df = 129) = 1289.4455, p-val < .0001
```

```
# Test of Moderators (coefficients 2:17):
# QM(df = 16) = 55.7220, p-val < .0001
```

# Model Results:

| #                   | OR     | se     | zval    | pval   | ci.lb  | ci.ub  |     |
|---------------------|--------|--------|---------|--------|--------|--------|-----|
| # intrcpt           | 0.4016 | 0.9812 | -0.9297 | 0.3525 | 0.0587 | 2.7479 |     |
| # SiteMixed         | 0.8499 | 0.3549 | -0.4582 | 0.6468 | 0.4240 | 1.7039 |     |
| # SiteWrist         | 0.6754 | 0.2434 | -1.6126 | 0.1068 | 0.4192 | 1.0882 |     |
| # TypeMixed         | 1.3707 | 0.2493 | 1.2651  | 0.2058 | 0.8410 | 2.2341 |     |
| # TypeOpen          | 1.4903 | 0.2919 | 1.3666  | 0.1717 | 0.8410 | 2.6409 |     |
| # InterventionKwire | 0.5709 | 0.3654 | -1.5341 | 0.1250 | 0.2789 | 1.1684 |     |
| # InterventionMixed | 0.3172 | 0.3345 | -3.4327 | 0.0006 | 0.1647 | 0.6110 | *** |
| # InterventionORIF  | 0.1942 | 0.3504 | -4.6767 | <.0001 | 0.0977 | 0.3860 | *** |
| # InterventionSTR   | 0.3481 | 0.4377 | -2.4105 | 0.0159 | 0.1476 | 0.8210 | *   |
| # RoBLow            | 0.9715 | 0.2770 | -0.1045 | 0.9167 | 0.5645 | 1.6718 |     |

```

# RoBModerate          0.7999 0.2229 -1.0017 0.3165 0.5168 1.2381
# StudytypeRetrospective 0.8312 0.2583 -0.7157 0.4742 0.5010 1.3790
# InfectionDefinitionClinical 2.1890 0.3647 2.1481 0.0317 1.0710 4.4741 *
# InfectionDefinitionUnknown 2.2493 0.4276 1.8958 0.0580 0.9729 5.1999 .
# StudydesignCase series 0.3059 0.8657 -1.3685 0.1712 0.0561 1.6687
# StudydesignCohort     0.1870 0.8579 -1.9546 0.0506 0.0348 1.0046 .
# StudydesignRCT        0.3385 0.9044 -1.1978 0.2310 0.0575 1.9923

```

---

```
# Signif. codes: 0 '***' 0.001 '**' 0.01 '*' 0.05 '.' 0.1 ' ' 1
```

```
###
```

```
vif(metareg.moderators) #colinearity
```

```

# SiteMixed SiteWrist TypeMixed TypeOpen InterventionKwire
InterventionMixed InterventionORIF InterventionSTR RoBLow RoBModerate
StudytypeRetrospective InfectionDefinitionClinical InfectionDefinitionUnknown
StudydesignCase series StudydesignCohort StudydesignRCT
# 1.3480 1.7483 1.5671 1.9617 2.9807 2.8728 2.0623
2.6545 1.2685 1.3417 1.8834 3.1246
2.8795 19.7996 21.9811 14.7955

```

```
### univariate meta-regression for study design (high colinearity) ###
```

```
metareg.moderators=rma(yi, vi, data=ies.logit,
                      mods=~Studydesign) #univariate study design
```

```

metareg.moderators$beta <- exp(metareg.moderators$beta)
metareg.moderators$ci.ub <- exp(metareg.moderators$ci.ub)
metareg.moderators$ci.lb <- exp(metareg.moderators$ci.lb)
print(metareg.moderators) #oddsratios

```

```
# Mixed-Effects Model (k = 146; tau^2 estimator: REML)
```

```

# tau^2 (estimated amount of residual heterogeneity): 1.1878 (SE = 0.1767)
# tau (square root of estimated tau^2 value): 1.0899
# I^2 (residual heterogeneity / unaccounted variability): 95.48%
# H^2 (unaccounted variability / sampling variability): 22.12
# R^2 (amount of heterogeneity accounted for): 5.51%

```

```

# Test for Residual Heterogeneity:
# QE(df = 142) = 4357.1378, p-val < .0001

```

```

# Test of Moderators (coefficients 2:4):
# QM(df = 3) = 9.0521, p-val = 0.0286

```

```
# Model Results:
```

```

#          OR    se    zval  pval  ci.lb  ci.ub
# intrcpt          0.2582 0.8873 -1.5257 0.1271 0.0454 1.4701
# StudydesignCase series 0.3396 0.9047 -1.1937 0.2326 0.0577 2.0002
# StudydesignCohort      0.1929 0.8997 -1.8292 0.0674 0.0331 1.1248 .
# StudydesignRCT         0.3039 0.9186 -1.2966 0.1948 0.0502 1.8392

#   Signif. codes:  0 '***' 0.001 '**' 0.01 '*' 0.05 '.' 0.1 ' ' 1

### multivariate meta-regression for all other variables (low colinearity) ###

metareg.moderators=rma(yi, vi, data=ies.logit,
                      mods=~Site+Type+Intervention+RoB+Studytype+InfectionDefinition)
#multivariate

metareg.moderators$beta <- exp(metareg.moderators$beta)
metareg.moderators$ci.ub <- exp(metareg.moderators$ci.ub)
metareg.moderators$ci.lb <- exp(metareg.moderators$ci.lb)
print(metareg.moderators) #oddsratios

###

# Mixed-Effects Model (k = 146; tau^2 estimator: REML)

# tau^2 (estimated amount of residual heterogeneity): 0.9715 (SE = 0.1561)
# tau (square root of estimated tau^2 value): 0.9857
# I^2 (residual heterogeneity / unaccounted variability): 90.29%
# H^2 (unaccounted variability / sampling variability): 10.30
# R^2 (amount of heterogeneity accounted for): 22.72%

# Test for Residual Heterogeneity:
# QE(df = 132) = 1563.5878, p-val < .0001

# Test of Moderators (coefficients 2:14):
# QM(df = 13) = 42.9688, p-val < .0001

# Model Results:

#          OR    se    zval  pval  ci.lb  ci.ub
# intrcpt          0.1352 0.5112 -3.9139 <.0001 0.0497 0.3683 ***
# SiteMixed          0.7943 0.3642 -0.6324 0.5271 0.3890 1.6218
# SiteWrist          0.7080 0.2446 -1.4116 0.1581 0.4383 1.1435
# TypeMixed          1.1549 0.2477 0.5815 0.5609 0.7108 1.8765
# TypeOpen           1.2735 0.2957 0.8176 0.4136 0.7133 2.2736
# InterventionKwire   0.5487 0.3723 -1.6121 0.1069 0.2645 1.1382
# InterventionMixed   0.2844 0.3352 -3.7516 0.0002 0.1474 0.5485 ***
# InterventionORIF    0.1708 0.3552 -4.9757 <.0001 0.0851 0.3426 ***
# InterventionSTR     0.3442 0.4418 -2.4141 0.0158 0.1448 0.8182 *
# RoBLow              0.9333 0.2834 -0.2437 0.8074 0.5355 1.6264
# RoBModerate         0.7966 0.2257 -1.0074 0.3137 0.5118 1.2398
# StudytypeRetrospective 0.8284 0.2262 -0.8325 0.4051 0.5318 1.2904

```



```
# InfectionDefinitionClinical 1.8715 0.3511 1.7850 0.0743 0.9404 3.7246 .
# InfectionDefinitionUnknown 1.8893 0.4157 1.5305 0.1259 0.8365 4.2670
```

```
# Signif. codes: 0 '***' 0.001 '**' 0.01 '*' 0.05 '.' 0.1 ' ' 1
```

```
permutest(metareg.moderators) #permutation
print(metareg.moderators)
```

```
# Mixed-Effects Model (k = 146; tau^2 estimator: REML)
```

```
# tau^2 (estimated amount of residual heterogeneity): 0.9715 (SE = 0.1561)
# tau (square root of estimated tau^2 value): 0.9857
# I^2 (residual heterogeneity / unaccounted variability): 90.29%
# H^2 (unaccounted variability / sampling variability): 10.30
# R^2 (amount of heterogeneity accounted for): 22.72%
```

```
# Test for Residual Heterogeneity:
# QE(df = 132) = 1563.5878, p-val < .0001
```

```
# Test of Moderators (coefficients 2:14):
# QM(df = 13) = 42.9688, p-val < .0001
```

```
# Model Results:
```

```
# estimate se zval pval ci.lb ci.ub
# intrcpt 0.1352 0.5112 -3.9139 <.0001 0.0497 0.3683 ***
# SiteMixed 0.7943 0.3642 -0.6324 0.5271 0.3890 1.6218
# SiteWrist 0.7080 0.2446 -1.4116 0.1581 0.4383 1.1435
# TypeMixed 1.1549 0.2477 0.5815 0.5609 0.7108 1.8765
# TypeOpen 1.2735 0.2957 0.8176 0.4136 0.7133 2.2736
# InterventionKwire 0.5487 0.3723 -1.6121 0.1069 0.2645 1.1382
# InterventionMixed 0.2844 0.3352 -3.7516 0.0002 0.1474 0.5485 ***
# InterventionORIF 0.1708 0.3552 -4.9757 <.0001 0.0851 0.3426 ***
# InterventionSTR 0.3442 0.4418 -2.4141 0.0158 0.1448 0.8182 *
# RoBLow 0.9333 0.2834 -0.2437 0.8074 0.5355 1.6264
# RoBModerate 0.7966 0.2257 -1.0074 0.3137 0.5118 1.2398
# StudytypeRetrospective 0.8284 0.2262 -0.8325 0.4051 0.5318 1.2904
# InfectionDefinitionClinical 1.8715 0.3511 1.7850 0.0743 0.9404 3.7246 .
# InfectionDefinitionUnknown 1.8893 0.4157 1.5305 0.1259 0.8365 4.2670
```

```
# Signif. codes: 0 '***' 0.001 '**' 0.01 '*' 0.05 '.' 0.1 ' ' 1
```

Supplementary File 6. References for included studies

| Study             | Reference | Citation                                                                                                                                                                                                                                                                                                                                                                                  |
|-------------------|-----------|-------------------------------------------------------------------------------------------------------------------------------------------------------------------------------------------------------------------------------------------------------------------------------------------------------------------------------------------------------------------------------------------|
| Abouelela 2020    | 1         | Abouelela A, Mubark I, Hassan M, Howells M, Ashwood N, Kitsis C. Mid-Term Outcomes of Unstable Complex Proximal Interphalangeal Joint Fracture Management Using the Ligamentotaxor® Device: A Case Series of 33 Cases. <i>Cureus</i> . 2020 Sep;12(9):e10519.                                                                                                                             |
| Abulsoud 2021     | 2         | Abulsoud M.I., Elmarghany M., Abdelghany T., Abdelaal M., Elhalawany M.F., Zakaria A.R. A Single Intramedullary K-Wire Is Sufficient for the Management of Nonthumb Metacarpal Shaft Fractures. <i>Adv Orthop</i> . 2021;2021((Abulsoud, Elmarghany, Abdelghany, Abdelaal, Elhalawany) Department of Orthopedic Surgery, Faculty of Medicine, Al-Azhar University, Cairo, Egypt):9963186. |
| Adkison 1982      | 3         | Adkison JW, Chapman MW. Treatment of acute lunate and perilunate dislocations. <i>Clin Orthop</i> . 1982 Apr;(164):199–207.                                                                                                                                                                                                                                                               |
| Afshar 2020       | 4         | Afshar A, Tabrizi A, Taleb H, Safari M. Results of fracture-dislocation of interphalangeal treatment with volar buttressing hook plating techniques. <i>Orthop Traumatol Surg Res</i> . 2020 Jun;106(4):765–9.                                                                                                                                                                            |
| Ahmad 2006        | 5         | Ahmad M, Hussain SS, Rafiq Z, Tariq F, Khan MI, Malik SA. Management of phalangeal fractures of hand. <i>J Ayub Med Coll Abbottabad JAMC</i> . 2006;18(4):38–41.                                                                                                                                                                                                                          |
| Ahmad 2022        | 6         | Ahmad F., Neral M., Hoyen H., Simcock X., Malone K. Does Time to Operative Intervention of Distal Radius Fractures Influence Outcomes? <i>Hand N Y N</i> . 2022;((Ahmad, Simcock) Rush University Medical Center, Chicago, United States):15589447211072220.                                                                                                                              |
| Aigner 2014       | 7         | Aigner R, Debus F, Karaman Y, López-López C, Ruchholtz S, Kühne CA. [Outcomes after operative treatment of distal radius fractures - an analysis of 721 patients]. <i>Z Orthopadie Unfallchirurgie</i> . 2014 Aug;152(4):375–80.                                                                                                                                                          |
| Akmaz 2003        | 8         | Akmaz I, Kiral A, Pehlivan O, Solakoğlu C. [Ligament reconstruction for the chronic instability of the traumatic thumb carpometacarpal joint]. <i>Acta Orthop Traumatol Turc</i> . 2003;37(3):237–43.                                                                                                                                                                                     |
| Al-Qattan 2005    | 9         | Al-Qattan MM. De-epithelialized cross-finger flaps versus adipofascial turnover flaps for the reconstruction of small complex dorsal digital defects: A comparative analysis. <i>J Hand Surg</i> . 2005 May;30(3):549–57.                                                                                                                                                                 |
| Al-Qattan 2008    | 10        | Al-Qattan MM. The cross-digital dorsal adipofascial flap. <i>Ann Plast Surg</i> . 2008 Feb;60(2):150–3.                                                                                                                                                                                                                                                                                   |
| Al-Qattan 2011    | 11        | Al-Qattan MM. Displaced unstable transverse fractures of the shaft of the proximal phalanx of the fingers in industrial workers: reduction and K-wire fixation leaving the metacarpophalangeal and proximal interphalangeal joints free. <i>J Hand Surg Eur Vol</i> . 2011 Sep;36(7):577–83.                                                                                              |
| Al-Qattan 2012    | 12        | Al-Qattan MM. Saw injuries causing phalangeal neck fractures in adults. <i>Ann Plast Surg</i> . 2012 Jul;69(1):38–40.                                                                                                                                                                                                                                                                     |
| Al-Shahwanii 2021 | 13        | Al-Shahwanii Z.W., Qaryaqos S.H. Comparative study between volar locked plates versus closed reduction with percutaneous pinning in management of unstable extra-articular distal radius fractures. <i>J Pak Med Assoc</i> . 2021;71(12):S35–9.                                                                                                                                           |
| Ali 2007          | 14        | Ali H, Rafique A, Bhatti M, Ghani S, Sadiq M, Beg SA. Management of fractures of metacarpals and phalanges and associated risk factors for delayed healing. <i>J-Pak Med Assoc</i> . 2007;57(2):64.                                                                                                                                                                                       |

|                  |    |                                                                                                                                                                                                                                                                                     |
|------------------|----|-------------------------------------------------------------------------------------------------------------------------------------------------------------------------------------------------------------------------------------------------------------------------------------|
| An 2013          | 15 | An Y, Wang ZX, Yuan S, Zhang YQ, Zhang J. Surgical method of fixed needle extrusion in treatment of bony mallet finger and evaluation on curative effect. J Jilin Univ Med Ed. 2013 Mar;39(2):371–4.                                                                                |
| Anakwe 2010      | 16 | Anakwe R, Khan L, Cook R, McEachan J. Locked volar plating for complex distal radius fractures: Patient reported outcomes and satisfaction. J Orthop Surg. 2010 Aug;5:51.                                                                                                           |
| Anderson 2004    | 17 | Anderson JT, Lucas GL, Buhr BR. Complications of treating distal radius fractures with external fixation: a community experience. Iowa Orthop J. 2004;24:53–9.                                                                                                                      |
| Arora 2022       | 18 | Arora S., Govil V., Neogi A.K., Bishnoi S., Paul S., Gupta R.K. Functional and Radiological Outcomes in Intra-Articular Fractures of Distal Radius with Volar Variable Angle Locking Plates. Trauma Mon. 2022;27(1):380–5.                                                          |
| Aydin 2010       | 19 | Aydin N, Uraloglu M, Yilmaz Burhanoglu AD, Sensoz O. A prospective trial on the use of antibiotics in hand surgery. Plast Reconstr Surg. 2010 Nov;126(5):1617–23.                                                                                                                   |
| Azzopardi 2005   | 20 | Azzopardi T, Ehrendorfer S, Coulton T, Abela M. Unstable extra-articular fractures of the distal radius. J Bone Jt Surg - Ser B. 2005 Jun;87(6):837–40.                                                                                                                             |
| Bach 2006        | 21 | Bach HG, Gonzalez MH, Hall Jr RF. Locked Intramedullary Nailing of Metacarpal Fractures Secondary to Gunshot Wounds. J Hand Surg. 2006 Sep;31(7):1083–7.                                                                                                                            |
| Baldwin 2021     | 22 | Baldwin A.J., Jackowski A., Jamal A., Vaz J., Rodrigues J.N., Tyler M., et al. Risk of surgical site infection in hand trauma, and the impact of the SARS-CoV-2 pandemic: A cohort study. J Plast Reconstr Aesthet Surg. 2021;74(11):3080–6.                                        |
| Basat 2017       | 23 | Basat NB, Allon R, Nagmi A, Wollstein R. Treatment of open fractures of the hand in the emergency department. Eur J Orthop Surg Traumatol Orthop Traumatol. 2017 Apr;27(3):415–9.                                                                                                   |
| Baumgartner 2021 | 24 | Baumgartner RE, Federer AE, Guerrero EM, Mithani SK, Ruch DS, Richard MJ. Complications of Low-Profile Plate Fixation in Metacarpal Fractures. Orthopedics. 2020 Oct;1–4.                                                                                                           |
| Bauze 1999       | 25 | Bauze A, Bain GI. Internal suture for mallet finger fracture. J Hand Surg Edinb Scotl. 1999 Dec;24(6):688–92.                                                                                                                                                                       |
| Bednar 2004      | 26 | Bednar DA, Al-Harran H. Nonbridging external fixation for fractures of the distal radius. Can J Surg. 2004 Dec;47(6):426–30.                                                                                                                                                        |
| Beeres 2021      | 27 | Beeres FJP, Liechti R, Link BC, Babst R. Role of a spanning plate as an internal fixator in complex distal radius fractures. Oper Orthopadie Traumatol. 2020 Nov;                                                                                                                   |
| Bennur 2021      | 28 | Bennur A.T., Tulaja Prasad P.V., Bennur N.A. An evaluation of outcome of surgical management of unstable comminuted fracture of distal radius using external and internal fixation. Eur J Mol Clin Med. 2021;8(4):2029–33.                                                          |
| Benson 2006      | 29 | Benson LS, Edwards SL, Schiff AP, Williams CS, Visotsky JL. Dog and cat bites to the hand: treatment and cost assessment. J Hand Surg. 2006 Mar;31(3):468–73.                                                                                                                       |
| Berwald 2014     | 30 | Berwald N, Khan F, Zehtabchi S. Antibiotic prophylaxis for ED patients with simple hand lacerations: a feasibility randomized controlled trial. Am J Emerg Med. 2014 Jul;32(7):768–71.                                                                                              |
| Bhat 2002        | 31 | Bhat JA, Maajid S. Results of open proximal phalangeal fractures by 'gantry technique'. JK Sci. 2002;4(2):83–6.                                                                                                                                                                     |
| Botte 1992       | 32 | Botte MJ, Davis JL, Rose BA, von Schroeder HP, Gellman H, Zinberg EM, et al. Complications of smooth pin fixation of fractures and dislocations in the hand and wrist. Clin Orthop. 1992 Mar;(276):194–201.                                                                         |
| Boussakri 2014   | 33 | Boussakri H, Elidrissi M, Azarkane M, Bensaad S, Bachiri M, Shimi M, et al. Fractures of the neck of the fifth metacarpal bone, treated by percutaneous intramedullary nailing: surgical technique, radiological and clinical results study (28 cases). Pan Afr Med J. 2014;18:187. |

|                  |    |                                                                                                                                                                                                                                                                                      |
|------------------|----|--------------------------------------------------------------------------------------------------------------------------------------------------------------------------------------------------------------------------------------------------------------------------------------|
| Brei-Thoma 2015  | 34 | Brei-Thoma P, Vögelin E, Franz T. Plate fixation of extra-articular fractures of the proximal phalanx: do new implants cause less problems? Arch Orthop Trauma Surg. 2015 Mar;135(3):439–45.                                                                                         |
| Camacho 2021     | 35 | Camacho E., Craviotto M., D'Oliveira L. How to Manage Complications Related to the Use of Intramedullary Screws in Metacarpal Fractures: Case Series. Rev Iberoam Cirugia Mano. 2021;49(1):4–12.                                                                                     |
| Campochiaro 2011 | 36 | Campochiaro G, Tsatsis C, Gazzotti G, Rebuzzi M, Tronci V, Rovesta C, et al. Intra-articular distal radius fractures: A clinical and radiographic comparison of treatment with volar angular stability plate and percutaneous pinning with K-wires. J Orthop Traumatol. 2011 Oct;12. |
| Capo 2011        | 37 | Capo JT, Hall M, Nourbakhsh A, Tan V, Henry P. Initial management of open hand fractures in an emergency department. Am J Orthop Belle Mead NJ. 2011 Dec;40(12):E243.                                                                                                                |
| Chafik 2011      | 38 | Chafik R, Madhar M, El Bouanani A, Saidi H, Fikry T. Le fixateur externe digital, nouveau materiel (a propos de 24 cas)The digital external fixator, new equipment (24 cases report). Chir Main. 2011 Apr;30(2):110–3.                                                               |
| Cheah 2012       | 39 | Cheah AEJ, Tan DMK, Chong AKS, Chew WYC. Volar Plating for Unstable Proximal Interphalangeal Joint Dorsal Fracture-Dislocations. J Hand Surg.                                                                                                                                        |
| Cheng 2020       | 40 | Cheng P, Wu F, Chen H, Jiang C, Wang T, Han P, et al. Early hybrid nonbridging external fixation of unstable distal radius fractures in patients aged >=50 years. J Int Med Res. 2019;48(4).                                                                                         |
| Choubey 2022     | 41 | Choubey R., Agarwal G., Kiradiya N., Gupta A., Jain R.K. Outcome Analysis of Fracture Lower End Radius (AO Type B & C) Treated by Orifand Plate. Eur J Mol Clin Med. 2022;9(1):1274–81.                                                                                              |
| Chul-Ho 2021     | 42 | Chul-Ho K., Kim D.H., Han-Vit K., Kim W.J., Shin M., Kim J.W. Factors affecting healing following percutaneous intramedullary fixation of metacarpal fractures. Med U S. 2021;100(50):e27968.                                                                                        |
| Chung 2019       | 43 | Chung KC, Malay S, Shauver MJ, Kim HM. Assessment of Distal Radius Fracture Complications Among Adults 60 Years or Older: A Secondary Analysis of the WRIST Randomized Clinical Trial. JAMA Netw Open. 2019 Jan;2(1).                                                                |
| Conolly 1973     | 44 | Conolly WB, Goulston E. Problems of digital amputations: a clinical review of 260 patients and 301 amputations. Aust N Z J Surg. 1973 Sep;43(2):118–23.                                                                                                                              |
| Constantine 2022 | 45 | Constantine R.S., Le E.L.H., Gehring M.B., Ohmes L., Iorio M.L. Risk Factors for Infection After Distal Radius Fracture Fixation: Analysis of Impact on Cost of Care. J Hand Surg Glob Online. 2022;4(3):123–7.                                                                      |
| Costa 2014       | 46 | Costa ML, Achten J, Parsons NR, Rangan A, Griffin D, Tubeuf S, et al. Percutaneous fixation with Kirschner wires versus volar locking plate fixation in adults with dorsally displaced fracture of distal radius: Randomised controlled trial. BMJ Online. 2014;349:1–10.            |
| Costa 2022       | 47 | Costa ML, Achten J, Ooms A, Png ME, Cook JA, Lamb SE, et al. Surgical fixation with K-wires versus casting in adults with fracture of distal radius: DRAFFT2 multicentre randomised clinical trial. BMJ. 2022 Jan 19;376:e068041.                                                    |
| Davies 2020      | 48 | Davies J, Roberts T, Limb R, Mather D, Thornton D, Wade RG. Time to surgery for open hand injuries and the risk of surgical site infection: a prospective multicentre cohort study. J Hand Surg Eur Vol. 2020 Jul;45(6):622–8.                                                       |
| de Haseth 2015   | 49 | de Haseth KB, Neuhaus V, Mudgal CS. Dorsal fracture-dislocations of the proximal interphalangeal joint: evaluation of closed reduction and percutaneous Kirschner wire pinning. Hand N Y N. 2015 Mar;10(1):88–93.                                                                    |
| Dennison 2007    | 50 | Dennison DG. Open reduction and internal locked fixation of unstable distal ulna fractures with concomitant distal radius fracture. J Hand Surg. 2007;32(6):801–5.                                                                                                                   |

|                 |    |                                                                                                                                                                                                                                                                                                         |
|-----------------|----|---------------------------------------------------------------------------------------------------------------------------------------------------------------------------------------------------------------------------------------------------------------------------------------------------------|
| Dias 2020       | 51 | Dias JJ, Brealey SD, Fairhurst C, Amirfeyz R, Bhowal B, Blewitt N, et al. Surgery versus cast immobilisation for adults with a bicortical fracture of the scaphoid waist (SWIFFT): a pragmatic, multicentre, open-label, randomised superiority trial. <i>The Lancet</i> . 2020 Aug;396(10248):390–401. |
| Donnally 2017   | 52 | Donnally CJ, Hannay W, Rapp DA, Lekic N, Dodds SD. Machete injuries to the upper extremity. <i>Arch Orthop Trauma Surg</i> . 2017 Dec;137(12):1615–21.                                                                                                                                                  |
| Dumont 2007     | 53 | Dumont C, Fuchs M, Burchhardt H, Appelt D, Bohr S, Stürmer KM. Clinical results of absorbable plates for displaced metacarpal fractures. <i>J Hand Surg</i> . 2007 Apr;32(4):491–6.                                                                                                                     |
| Duncan 1993     | 54 | Duncan RW, Freeland AE, Jabaley ME, Meydrech EF. Open hand fractures: an analysis of the recovery of active motion and of complications. <i>J Hand Surg</i> . 1993 May;18(3):387–94.                                                                                                                    |
| Dwyer 2017      | 55 | Dwyer CL, Crosby NE, Cooney T, Seeds W, Lubahn JD. Treating Unstable Distal Radius Fractures With a Nonspanning External Fixation Device: Comparison With Volar Locking Plates in Historical Control Group. <i>Am J Orthop Belle Mead NJ</i> . 46(5):E344.                                              |
| Eglseder 1993   | 56 | Eglseder WA, Hay M. Open half-pin insertion for distal radial fractures. <i>Mil Med</i> . 1993 Nov;158(11):708–11.                                                                                                                                                                                      |
| Egol 2006       | 57 | Egol KA, Paksima N, Puopolo S, Klugman J, Hiebert R, Koval KJ. Treatment of external fixation pins about the wrist: A prospective, randomized trial. <i>J Bone Jt Surg - Ser A</i> . 2006 Feb;88(2):349–54.                                                                                             |
| Egol 2010       | 58 | Egol KA, Walsh M, Romo-Cardoso S, Dorsky S, Paksima N. Distal radial fractures in the elderly: Operative compared with nonoperative treatment. <i>J Bone Jt Surg - Ser A</i> . 2010 Aug;92(9):1851–7.                                                                                                   |
| Erken 2015      | 59 | Erken HY, Akmaz I, Takka S, Kiral A. Reconstruction of the transverse and dorsal-oblique amputations of the distal thumb with volar cross-finger flap using the index finger. <i>J Hand Surg Eur Vol</i> . 2015 May;40(4):392–400.                                                                      |
| Fan 2016        | 60 | Fan J, Jiang B, Yuan F, Li SZ, Zhou JQ, Mei J, et al. [Clinical effect of compound internal fixations in treating extreme distal radial fractures]. <i>Zhonghua Wai Ke Za Zhi</i> . 2016 Oct;54(10):766–71.                                                                                             |
| Faruqui 2012    | 61 | Faruqui S, Stern PJ. Percutaneous pinning of proximal phalangeal base fractures: Unacceptable outcomes: Level 3 evidence. <i>J Hand Surg</i> . 2012 Sep;37(8):38–9.                                                                                                                                     |
| Feldman 2021    | 62 | Feldman G., Orbach H., Rozen N., Rubin G. Usefulness of prophylactic antibiotics in preventing infection after internal fixation of closed hand fractures. <i>Hand Surg Rehabil</i> . 2021;40(2):167–70.                                                                                                |
| Ficke 2018      | 63 | Ficke B, Ransom EF, Hess MC, Moon AS, McKissack HM, Shah A, et al. Outcomes of Staged Treatment for Complex Distal Radius Fractures. <i>Cureus</i> . 2018 Sep;10(9):e3273.                                                                                                                              |
| Földhazy 2010   | 64 | Földhazy Z, Ahrengart L. External fixation versus closed treatment of displaced distal radial fractures in elderly patients: a randomized controlled trial. <i>Curr Orthop Pract</i> . 2010 Jun;21(3):288.                                                                                              |
| Frueh 2014      | 65 | Frueh FS, Kunz VS, Gravestock IJ, Held L, Haefeli M, Giovanoli P, et al. Primary flexor tendon repair in zones 1 and 2: early passive mobilization versus controlled active motion. <i>J Hand Surg</i> . 2014 Jul;39(7):1344–50.                                                                        |
| Fu 2006         | 66 | Fu YC, Chien SH, Huang PJ, Chen SK, Tien YC, Lin GT, et al. Use of an external fixation combined with the buttress-maintain pinning method in treating comminuted distal radius fractures in osteoporotic patients. <i>J Trauma - Inj Infect Crit Care</i> . 2006 Feb;60(2):330–3.                      |
| Galivanche 2021 | 67 | Galivanche A.R., FitzPatrick S., Dussik C., Malpani R., Nduaguba A., Varthi A.G., et al. A Matched Comparison of Postoperative Complications Between Smokers and Nonsmokers Following Open Reduction Internal Fixation of Distal Radius Fractures. <i>J Hand Surg</i> . 2021;46(1):1.                   |

|                 |    |                                                                                                                                                                                                                                                                                                  |
|-----------------|----|--------------------------------------------------------------------------------------------------------------------------------------------------------------------------------------------------------------------------------------------------------------------------------------------------|
| Gereli 2010     | 68 | Gereli A, Nalbantoğlu U, Kocaoğlu B, Türkmen M. Comparison of palmar locking plate and K-wire augmented external fixation for intra-articular and comminuted distal radius fractures. <i>Acta Orthop Traumatol Turc.</i> 2010;44(3):212–9.                                                       |
| Ghosh 2013      | 69 | Ghosh S, Sinha RK, Datta S, Chaudhuri A, Dey C, Singh A. A study of hand injury and emergency management in a developing country. <i>Int J Crit Illn Inj Sci.</i> 2013 Oct;3(4):229–34.                                                                                                          |
| Goslings 1999   | 70 | Goslings JC, Boxma H, Hauet EJ, Van Riet YEA, Keeman JN, Broekhuizen AH. Three-dimensional dynamic external fixation of distal radial fractures. A prospective study. <i>Injury.</i> 1999 May;30(6):421–30.                                                                                      |
| Gradl 2005      | 71 | Gradl G, Gierer P, Mittlmeier T, Jupiter JB. Fractures of the distal radius treated with a nonbridging external fixation technique using multiplanar K-wires. <i>J Hand Surg.</i> 2005 Sep;30(5):960–8.                                                                                          |
| Grossman 1981   | 72 | Grossman JAI, Adams JP, Kunec J. Prophylactic antibiotics in simple hand lacerations. <i>J Am Med Assoc.</i> 1981;245(10):1055–6.                                                                                                                                                                |
| Grundberg 1981  | 73 | Grundberg AB. Intramedullary fixation for fractures of the hand. <i>J Hand Surg.</i> 1981 Nov;6(6):568–73.                                                                                                                                                                                       |
| Guerrero 2019   | 74 | Guerrero EM, Baumgartner RE, Federer AE, Mithani SK, Ruch DS, Richard MJ. Complications of Low-Profile Plate Fixation of Phalanx Fractures. <i>Hand N Y N.</i> 2019 Jun;                                                                                                                         |
| Gumussuyu 2021  | 75 | Gumussuyu G., Asoglu M.M., Guler O., May H., Turan A., Kose O. Extension pin block technique versus extension orthosis for acute bony mallet finger; a retrospective comparison. <i>Orthop Traumatol Surg Res.</i> 2021;107(5):102764.                                                           |
| Hargreaves 2004 | 76 | Hargreaves DG DS. Kirschner wire pin tract infection rates: a randomized controlled trial between percutaneous and buried wires. <i>J Hand Surg.</i> 2004;29(4):374–6.                                                                                                                           |
| Henry 2008      | 77 | Henry M. Specific complications associated with different types of intrinsic pedicle flaps of the hand. <i>J Reconstr Microsurg.</i> 2008 Apr;24(3):221–5.                                                                                                                                       |
| Henry 2020      | 78 | Henry TW, Matzon JL, McEntee RM, Lutsky KF. Outcomes of Type I Open Distal Radius Fractures: A Comparison of Delayed and Urgent Open Reduction Internal Fixation. <i>Hand N Y N.</i> 2020 Nov;1558944720964965.                                                                                  |
| Hery 2022       | 79 | Hery J.-C., Champain G., Lombard A., Hulet C., Malherbe M. Relevance of antibiotic prophylaxis in the management of surgical emergency open hand trauma. <i>Hand Surg Rehabil.</i> 2022;41(1):137–41.                                                                                            |
| Horton 2003     | 80 | Horton TC, Hatton M, Davis TRC. A prospective randomized controlled study of fixation of long oblique and spiral shaft fractures of the proximal phalanx: Closed reduction and percutaneous Kirschner wiring versus open reduction and lag screw fixation. <i>J Hand Surg.</i> 2003 Feb;(1):5–9. |
| Hove 1997       | 81 | Hove LM, Furnes O, Nilsen PT, Solheim E, Molster AO, Oulie HE. Closed reduction and external fixation of unstable fractures of the distal radius. <i>Scand J Plast Reconstr Surg Hand Surg.</i> 1997;31(2):159–64.                                                                               |
| Hove 2010       | 82 | Hove LM, Krukhaug Y, Helland P, Revheim K, Finsen V. Dynamic compared with static external fixation of unstable fractures of the distal part of the radius: A prospective, randomized multicenter study. <i>J Bone Jt Surg - Ser A.</i> 2010 Jul;92(8):1687–96.                                  |
| Huang 2018      | 83 | Huang YC, Hsu CJ, Renn JH, Lin KC, Yang SW, Tarng YW, et al. WALANT for distal radius fracture: open reduction with plating fixation via wide-awake local anesthesia with no tourniquet. <i>J Orthop Surg.</i> 2018 Aug;13(1):195.                                                               |
| Hussain 2013    | 84 | Hussain MA, Mui S, Pandya A, Tan E, Pandya AN. Pulp tissue anchor repair for the zone I flexor tendon injury: Introduction of a new and cost-effective technique. <i>Eur J Plast Surg.</i> 2013 Jan;36(1):27–30.                                                                                 |
| Ibrahim 2022    | 85 | Ibrahim J., Hoffman R.A., Silva S., Criner-Woozley K. Incidence of Nerve Transection in Upper Extremity Gunshot Wounds. <i>Bull Hosp Joint Dis.</i> 2022;80(2):224–7.                                                                                                                            |

|                 |     |                                                                                                                                                                                                                                                                                                                                                                                                         |
|-----------------|-----|---------------------------------------------------------------------------------------------------------------------------------------------------------------------------------------------------------------------------------------------------------------------------------------------------------------------------------------------------------------------------------------------------------|
| Ignacio 1999    | 86  | Ignacio H, Chueire AG, Caravalho Filho G, De Oliveira Carneiro M. Fixacao externa radio-radial no tratamento de fratura da extremidade distal do radioExternal radio-radial fixation in the treatment of distal end radius fractures. Rev Bras Ortop. 1999;34(9):535–42.                                                                                                                                |
| Johandi 2017    | 87  | Johandi F, Sechachalam S. Clinical and functional outcome of open primary repair of triangular fibrocartilage complex tears associated with distal radius fractures. J Orthop Surg Hong Kong. 2017 Jan;25(1):2309499017690984.                                                                                                                                                                          |
| Johnson 2021    | 88  | Johnson A.R., Lainez S.S., Santos H.J., Chen A.D., Lainez C., Lin S.J., et al. Beyond the Tip of the Blade: An Investigation of Upper Extremity Machete Injuries in Honduras. J Reconstr Microsurg. 2021;37(3):263–71.                                                                                                                                                                                  |
| Jokhio 2021     | 89  | Jokhio M.F., Rehman N.U., Baloch R.A., Soomro M.A., Silro A.K., Keerio N.H., et al. Open reduction and internal fixation of intra-articular distal radius fracture by buttress plate: An outcome assessment. Int J Res Pharm Sci. 2021;12(3):1939–42.                                                                                                                                                   |
| Joo 2022        | 90  | Joo M.S., Kang H.J., Yu H.K., Lee J.S. Outcomes of Primary Volar Locking Plate Fixation of Open Distal Radius Fractures. J Hand Surg Asian-Pac Vol [Internet]. 2022;((Joo, Kang, Yu) Department Of Orthopedic Surgery, Wonkwang University Hospital, Iksan, South Korea). Available from: <a href="https://www.worldscientific.com/worldscinet/jhs">https://www.worldscientific.com/worldscinet/jhs</a> |
| Joosten 1999    | 91  | Joosten U, Joist A, Frebel T, Rieger H. [The treatment of unstable fractures of the distal radius using a bridging external fixator. Results from a long-term evaluation]. Chir Z Alle Geb Oper Medizen. 1999 Nov;70(11):1315–22.                                                                                                                                                                       |
| Jose 2017       | 92  | Jose A, Suranigi SM, Deniese PN, Babu AT, Rengasamy K, Najimudeen S. Unstable Distal Radius Fractures Treated by Volar Locking Anatomical Plates. J Clin Diagn Res JCDR. 2017 Jan;11(1):RC04.                                                                                                                                                                                                           |
| Kadhüm 2022     | 93  | Kadhüm M., Georgiou A., Kanapathy M., Reissis D., Akhavanı M., Burr N., et al. Operative outcomes for wide awake local anesthesia versus regional and general anesthesia for flexor tendon repair. Hand Surg Rehabil. 2022;41(1):125–30.                                                                                                                                                                |
| Khan 2022       | 94  | Khan H, Adil A, Ul Ain N, Qureshi BA, Chishti UF, Malik TS. Outcome of Buried Versus Exposed Kirchner Wires in Terms of Infection in Fractures of Phalanges and Metacarpal Bones of Hand. Cureus. 2022;14(2):e22515.                                                                                                                                                                                    |
| Kilic 2015      | 95  | Kilic B, Zekiođlu A, Yücel AS. Flexor Tendon Injuries and Treatment Results of 67 Patients. Pak J Biol Sci PJBS. 2015 Jan;18(1):32–6.                                                                                                                                                                                                                                                                   |
| Kim 2013        | 96  | Kim JK, Park SD. Outcomes after volar plate fixation of low-grade open and closed distal radius fractures are similar. Clin Orthop. 2013 Jun;471(6):2030–5.                                                                                                                                                                                                                                             |
| Kivi 2011       | 97  | Mardani Kivi M, Asadi K, Hashemi Motlagh K, Shakiba M. Distal radius fracture, a comparison between closed reduction and long arm cast Vs. Closed reduction and percutaneous pinning and short arm cast. Shiraz E Med J. 2011 Jul;12(3):155–61.                                                                                                                                                         |
| Kömürcü 2005    | 98  | Komurcu M, Kamaci L, Ozdemir MT, Atesalp AS, Basbozkurt M. Radius distal uc kırıklarının (AO tip C2-C3) eksternal fiksatorle tedavisiTreatment of AO type C2-C3 fractures of the distal end of the radius with external fixation. Acta Orthop Traumatol Turc. 2005;39(1):39–45.                                                                                                                         |
| Kucukguven 2019 | 99  | Kucukguven A, Uzun H, Menku FD, Sert G, Aksu AE. Endoscopic retrieval of retracted flexor tendons: An atraumatic technique. J Plast Reconstr Aesthetic Surg JPRAS. 2019 Apr;72(4):622–7.                                                                                                                                                                                                                |
| Kural 2020      | 100 | Kural C, Tanriverdi B, Erçin E, Baca E, Yılmaz M. The surgical outcomes of trans-scaphoid perilunate fracture-dislocations. Turk J Med Sci. 2020 Feb;50(1):25–30.                                                                                                                                                                                                                                       |
| Kurzen 2006     | 101 | Kurzen P, Fusetti C, Bonaccio M, Nagy L. Complications after plate fixation of phalangeal fractures. J Trauma. 2006 Apr;60(4):841–3.                                                                                                                                                                                                                                                                    |
| Lallemand 2002  | 102 | Lallemand S, de Jesse Levas A. [Elastic stable intramedullary nailing of hand bones. ECMES even with the hand]. Chir Main. 2002 May;21(3):176–81.                                                                                                                                                                                                                                                       |

|                |     |                                                                                                                                                                                                                                                                                                                                                                                     |
|----------------|-----|-------------------------------------------------------------------------------------------------------------------------------------------------------------------------------------------------------------------------------------------------------------------------------------------------------------------------------------------------------------------------------------|
| Langridge 2021 | 103 | Langridge B, Griffin M, Akhavani M, Butler PE. Bennett's Fracture Repair-Which Method Results in the Best Functional Outcome? A Retrospective Cohort Analysis and Systematic Literature Review of Patient-Reported Functional Outcomes. <i>J Hand Microsurg.</i> 2021;13(2):81–8.                                                                                                   |
| Lassner 2001   | 104 | Lassner F, Becker M, Pallua N. [Therapy of soft tissue trauma in the acute phase of severe hand injuries]. <i>Chir Z Alle Geb Oper Medizen.</i> 2001 Dec;72(12):1439–45.                                                                                                                                                                                                            |
| Lattman 2011   | 105 | Lattmann T, Meier C, Dietrich M, Forberger J, Platz A. Results of volar locking plate osteosynthesis for distal radial fractures. <i>J Trauma - Inj Infect Crit Care.</i> 2011 Jun;70(6):1510–8.                                                                                                                                                                                    |
| Lauder 2015    | 106 | Lauder A, Allan CH, Hanel DP, Huang JI, Agnew S, Bakri K. Functional Outcomes Following Bridge Plate Fixation for Distal Radius Fractures. <i>J Hand Surg.</i> 2015 Aug;40(8):1554–62.                                                                                                                                                                                              |
| Lawson 2021    | 107 | Lawson A., Naylor J.M., Buchbinder R., Ivers R., Balogh Z.J., Smith P., et al. Surgical Plating vs Closed Reduction for Fractures in the Distal Radius in Older Patients: A Randomized Clinical Trial. <i>JAMA Surg.</i> 2021;156(3):229–37.                                                                                                                                        |
| Lee 2003       | 108 | Lee HC, Wong YS, Chan BK, Low CO. Fixation of distal radius fractures using AO titanium volar distal radius plate. <i>Hand Surg Int J Devoted Hand Up Limb Surg Relat Res J Asia-Pac Fed Soc Surg Hand.</i> 2003 Jul;8(1):7–15.                                                                                                                                                     |
| Lee 2020       | 109 | Lee JH, Lee JK, Park JS, Kim DH, Baek JH, Kim YJ, et al. Complications associated with volar locking plate fixation for distal radius fractures in 1955 cases: A multicentre retrospective study. <i>Int Orthop.</i> 2020 Oct;44(10):2057–67.                                                                                                                                       |
| Lee 2022       | 110 | Lee Y.J., Ryoo H.J., Shim H.-S. Prevention of postoperative adhesions after flexor tendon repair with acellular dermal matrix in Zones III, IV, and V of the hand A randomized controlled (CONSORT-compliant) trial. <i>Med U S.</i> 2022;101(3):e28630.                                                                                                                            |
| Levy 2021      | 111 | Levy K.H., Sedaghatpour D., Avoricani A., Kurtzman J.S., Koehler S.M. Outcomes of an aseptic technique for Kirschner wire percutaneous pinning in the hand and wrist. <i>Injury.</i> 2021;52(4):889–93.                                                                                                                                                                             |
| Li 2022        | 112 | Li Y., Zhang H. Effect of Joint Use of External Minifixator and Titanium Lockplate on Total Active Motion Range and Hand Function Recovery in Comminuted Metacarpal and Phalanx Fracture Patients. <i>J Healthc Eng.</i> 2022;2022((Li, Zhang) Department of Orthopedic Surgery, The First Affiliated Hospital of Jiamusi University, Heilongjiang, Jiamusi 154003, China):3566364. |
| Li C 2016      | 113 | Li C, Xu X, Su Y, Zhou T, Fan X, Xu Y. Treatment of scaphoid fractures using a memory alloy nail-foot-fixation device. <i>ANZ J Surg.</i> 2016 Jul;86(7–8):584–8.                                                                                                                                                                                                                   |
| Li S 2016      | 114 | Li S, Wu K, Xie L, Chen L. [MODIFIED INTRAMEDULLARY FIXATION WITH TWO Kirschner WIRES FOR EXTRA-ARTICULAR FRACTURE OF PROXIMAL PHALANGEAL BASE]. <i>Zhongguo Xiu Fu Chong Jian Wai Ke Za Zhi Zhongguo XiuFu Chongjian Waik</i> Zazhi Chin J Reparative Reconstr Surg. 2016 Aug;30(8):935–8.                                                                                         |
| Liechti 2022   | 115 | Liechti R., Babst R., Hug U., Link B.-C., van de Wall B.J.M., Knoke M., et al. The spanning plate as an internal fixator in complex distal radius fractures: a prospective cohort study. <i>Eur J Trauma Emerg Surg Off Publ Eur Trauma Soc.</i> 2022;48(3):2369–77.                                                                                                                |
| Liu Q 2021     | 116 | Liu Q, Guo W, Qu W, Ou X, Li R, Tian H. Treatment of volar defects of the finger using dorsal digital-metacarpal flap versus free medial plantar artery flap: a comparative study. <i>BMC Surg.</i> 2021 Jan;21(1):52.                                                                                                                                                              |
| Liu Y 2020     | 117 | Liu Y, Bai YM. Efficacy of non-bridging external fixation in treating distal radius fractures. <i>Orthop Surg.</i> 2020 Jun;12(3):776–83.                                                                                                                                                                                                                                           |
| Lopes 1997     | 118 | Lopes EI, Chakkour I, Lopes Filho JD, Gomes MD, Da Costa AC, Apocalypse MS. Tratamento das fraturas do radio distal: Uso da placa em 'T' volar Treatment of fractures of distal radius: Use of 'T' plate. <i>Rev Bras Ortop.</i> 1997;32(3):189–200.                                                                                                                                |
| Lundqvist 2022 | 119 | Lundqvist E, Fischer P, Wretenberg P, Pettersson K, Lopez Personat A, Sagerfors M. Volar Locking Plate Compared With Combined Plating of AO Type C Distal Radius Fractures: A Randomized Controlled Study of 150 Cases. <i>J Hand Surg.</i> 2022 Sep 1;47(9):813–22.                                                                                                                |



|                      |     |                                                                                                                                                                                                                                                                                                                                                                                                                                                                                                                  |
|----------------------|-----|------------------------------------------------------------------------------------------------------------------------------------------------------------------------------------------------------------------------------------------------------------------------------------------------------------------------------------------------------------------------------------------------------------------------------------------------------------------------------------------------------------------|
| Lutsky 2019          | 120 | Lutsky K, Edelman D, Leinberry C, Takei TR, Kwok M, Gallant G, et al. A Prospective Evaluation of Complications after Use of Exposed Pins in the Hand and Wrist. <i>Plast Reconstr Surg.</i> 2019 Jun;                                                                                                                                                                                                                                                                                                           |
| Lutz 2014            | 121 | Lutz K, Yeoh KM, MacDermid JC, Symonette C, Grewal R. Complications associated with operative versus nonsurgical treatment of distal radius fractures in patients aged 65 years and older. <i>J Hand Surg.</i> 2014 Jul;39(7):1280–6.                                                                                                                                                                                                                                                                            |
| Mahmood 2022         | 122 | Mahmood B., Golub I.J., Ashraf A.M., Ng M.K., Vakharia R.M., Choueka J. Risk Factors for Infections Following Open Reduction and Internal Fixation for Distal Radius Fractures An Analysis of the Medicare Claims Database. <i>Bull Hosp Joint Dis.</i> 2022;80(2):228–33.                                                                                                                                                                                                                                       |
| Maradei-Pereira 2021 | 123 | Maradei-Pereira JAR, Dos Santos AP, Martins JR, Maradei-Pereira MR. Infection after buried or exposed K-wire fixation of distal radial fractures: a randomized clinical trial. <i>J Hand Surg Eur Vol.</i> 2020 Jul;                                                                                                                                                                                                                                                                                             |
| Marshall 1978        | 124 | Marshall KA, Wolfort FG, Edlich RF. Immediate insertion of silicone rubber rods in fingers with cut flexor tendons. <i>Plast Reconstr Surg.</i> 1978 Jan;61(1):77–9.                                                                                                                                                                                                                                                                                                                                             |
| Marsland 2012        | 125 | Marsland D, Sanghrajka AP, Goldie B. Static monolateral external fixation for the Rolando fracture: a simple solution for a complex fracture. <i>Ann R Coll Surg Engl.</i> 2012 Mar;94(2):112–5.                                                                                                                                                                                                                                                                                                                 |
| Martins 2021         | 126 | Martins A., Artuso M., Marc Claise J. Bipedicle strap flaps for reconstruction of longitudinal dorsal finger defects: a review of 42 cases. <i>J Hand Surg Eur Vol.</i> 2021;46(8):873–6.                                                                                                                                                                                                                                                                                                                        |
| Mattiassich 2013     | 127 | Mattiassich G, Mayrhofer-Stelzhammer M, Huber W, Dorninger L, Kröpfl A. [Early functional treatment of intra-articular fractures of the proximal interphalangeal joint of the finger using a modified traction device]. <i>Handchir Mikrochir Plast Chir Organ Deutschsprachigen Arbeitsgemeinschaft Handchir Organ Deutschsprachigen Arbeitsgemeinschaft Mikrochir Peripher Nerven Gefasse Organ V.</i> 2013 Jun;45(3):167–74.                                                                                  |
| Matullo 2015         | 128 | Matullo KS, Dennison DG. Outcome following distally locked volar plating for distal radius fractures with metadiaphyseal involvement. <i>Hand N Y N.</i> 2015 Jun;10(2):292–6.                                                                                                                                                                                                                                                                                                                                   |
| McCallister 2006     | 129 | McCallister WV, Ambrose HC, Katolik LI, Trumble TE. Comparison of pullout button versus suture anchor for zone I flexor tendon repair. <i>J Hand Surg.</i> 2006 Feb;31(2):246–51.                                                                                                                                                                                                                                                                                                                                |
| Meaike 2021          | 130 | Meaike J.J., Athens C., Sgromolo N., Shin A.Y., Rhee P.C. Wound Complications with Multiple Wrist Incisions in Distal Radius Reconstruction. <i>J Wrist Surg [Internet].</i> 2021;((Meaike, Athens, Shin, Rhee) Department of Orthopedic Surgery, Mayo Clinic, 200 First Street SW, Rochester, MN 55905, United States). Available from: <a href="https://www.thieme-connect.com/products/ejournals/journal/10.1055/s-00000183">https://www.thieme-connect.com/products/ejournals/journal/10.1055/s-00000183</a> |
| Meena 2021           | 131 | Meena M., Ghosliya R.P., Naveen S., Tatwal D.K. Study of Functional Outcome of Intra-Articular Distal end Radius Fractures in Adults Treated by Distal Radius Locking Plate. <i>Eur J Mol Clin Med.</i> 2021;8(4):2526–34.                                                                                                                                                                                                                                                                                       |
| Mehdinasab 2012      | 132 | Mehdinasab SA, Pipelzadeh MR, Sarrafan N. Results of primary extensor tendon repair of the hand with respect to the zone of injury. <i>Arch Trauma Res.</i> 2012;1(3):131–4.                                                                                                                                                                                                                                                                                                                                     |
| Miao 2015            | 133 | Miao D, Yang G, Zhang L, Wu J. Case control study on therapeutic effects of dynamic external fixator combined with limited internal fixation and cross K-wires fixation for the treatment of Pilon fractures of the proximal interphalangeal joint. <i>Zhongguo Gu Shang China J Orthop Traumatol.</i> 2015 Oct;28(10):920–3.                                                                                                                                                                                    |
| Michael 2022         | 134 | Michael G, George K, Canjirathinkal MA, Ratna P, Francis J. Functional Outcome of Joshi's External Stabilization System Fixation in Distal Radius Fractures. <i>Cureus.</i> 2022;14(4):e24215.                                                                                                                                                                                                                                                                                                                   |
| Minhas 2019          | 135 | Minhas SV, Catalano LW. Comparison of Open and Closed Hand Fractures and the Effect of Urgent Operative Intervention. <i>J Hand Surg.</i> 2019 Jan;44(1):65.                                                                                                                                                                                                                                                                                                                                                     |

|                    |     |                                                                                                                                                                                                                                                                                                                                                                                 |
|--------------------|-----|---------------------------------------------------------------------------------------------------------------------------------------------------------------------------------------------------------------------------------------------------------------------------------------------------------------------------------------------------------------------------------|
| Mishra 2021        | 136 | Mishra R.K., Sharma B.P., Kumar A., Sherawat R. A comparative study of variable angle volar plate and bridging external fixator with K-wire augmentation in comminuted distal radius fractures. <i>Chin J Traumatol - Engl Ed.</i> 2021;24(5):301–5.                                                                                                                            |
| Naguib 2022        | 137 | Naguib M., Ramadan M., Ali T., El-Tantawy A. Simplified Kirschner-wire-based dynamic external fixator for unstable proximal interphalangeal joint fractures. <i>Eur J Trauma Emerg Surg Off Publ Eur Trauma Soc.</i> 2022;48(1):71–9.                                                                                                                                           |
| Nazerani 2009      | 138 | Nazerani S, Motamedi MHK. Ectopic single-finger transplantation, a novel technique for nonreplantable digits: assessment of 24 cases--presenting the 'piggyback' method. <i>Tech Hand Up Extrem Surg.</i> 2009 Jun;13(2):65–74.                                                                                                                                                 |
| Nazerani 2011      | 139 | Nazerani S, Motamedi MHK, Ebadi MR, Nazerani T, Bidarmaghz B. Experience with distal finger replantation: a 20-year retrospective study from a major trauma center. <i>Tech Hand Up Extrem Surg.</i> 2011 Sep;15(3):144–50.                                                                                                                                                     |
| Nguyen 2018        | 140 | Nguyen DT, Tran TS, Nguyen BH, Pham VD. [Covering of Finger-Tissue Loss by Local Flaps in Hanoi, Vietnam]. <i>Bull Soc Pathol Exot</i> 1990. 2018;111(2):121–5.                                                                                                                                                                                                                 |
| Noor 2021          | 141 | Noor F., Nasir H.M., Zahra F., Kumar J., Ali S. Compare the outcomes of mini-plate versus K-wire fixation in patients with shaft of metacarpal fractures. <i>Pak J Med Health Sci.</i> 2021;15(6):1469–71.                                                                                                                                                                      |
| Nygaard 2011       | 142 | Nygaard M, Dahlin LB. Dog bite injuries to the hand. <i>J Plast Surg Hand Surg.</i> 2011 Apr;45(2):96–101.                                                                                                                                                                                                                                                                      |
| Ochman 2006        | 143 | Ochman S, Frerichmann U, Armsen N, Raschke MJ, Meffert RH. [Is use of the fixateur externe no longer indicated for the treatment of unstable radial fracture in the elderly?]. <i>Unfallchirurg.</i> 2006 Dec;109(12):1050–7.                                                                                                                                                   |
| Ornelli 2019       | 144 | Ornelli M, Ruocco G, Kaciulyte J, Lazzaro L, Felici N. Immediate vs. delayed toe-to-thumb transfer: Is the infection rate greater? <i>Handchir Mikrochir Plast Chir Organ Deutschsprachigen Arbeitsgemeinschaft Handchir Organ Deutschsprachigen Arbeitsgemeinschaft Mikrochir Peripher Nerven Gefasse Organ V.</i> 2019 Dec;51(6):434–9.                                       |
| Page 1998          | 145 | Page SM, Stern PJ. Complications and range of motion following plate fixation of metacarpal and phalangeal fractures. <i>J Hand Surg.</i> 1998 Sep;23(5):827–32.                                                                                                                                                                                                                |
| Pan 2020           | 146 | Pan J, Li M, Huang Y, Dong J, Wang X, Wang L. Pure perforator free sensory proximal ulnar artery perforator flap for resurfacing hand defects. <i>J Int Med Res.</i> 2020 May;48(5):300060520922396.                                                                                                                                                                            |
| Parmaksizoglu 2016 | 147 | Parmaksizoglu AS, Ozkaya U, Mutlu H, Cetin U, Bilgili F. Fixation of extra-articular distal humeral fractures with a lateral approach and a locked plate: an alternative method. <i>Acta Orthop Traumatol Turc.</i> 2016;50(2):132–8.                                                                                                                                           |
| Peacock 1988       | 148 | Peacock KC, Hanna DP, Kirkpatrick K, Breidenbach WC, Lister GD, Firrell J. Efficacy of perioperative cefamandole with postoperative cephalixin in the primary outpatient treatment of open wounds of the hand. <i>J Hand Surg.</i> 1988 Nov;13(6):960–4.                                                                                                                        |
| Pelissier 2015     | 149 | Pélissier P, Gobel F, Choughri H, Alet JM. Proximal interphalangeal joint fractures treated with a dynamic external fixator: A multicenter and retrospective study of 88 cases. <i>Chir Main.</i> 2015 Oct;34(5):245–50.                                                                                                                                                        |
| Platt 1995         | 150 | Platt AJ PR. Post-operative infection following hand surgery: Guidelines for antibiotic use. <i>J Hand Surg Eur Vol.</i> 1995;20(5):685–90.                                                                                                                                                                                                                                     |
| Prunieres 2016     | 151 | Prunieres G, Gouzou S, Facca S, Matheron AS, Maire N, Hidalgo Diaz JJ, et al. Traitement des fractures instables de la phalange distale par brochage extra-articulaire de l'interphalangienne distale : a propos de 12 cas Treatment of unstable distal phalanx fractures by extra-articular DIP pinning: A series of 12 cases. <i>Hand Surg Rehabil.</i> 2016 Oct;35(5):330–4. |
| Rabarin 2016       | 152 | Rabarin F, Saint Cast Y, Jeudy J, Fouque PA, Cesari B, Bigorre N, et al. Cross-finger flap for reconstruction of fingertip amputations: Long-term results. <i>Orthop Traumatol Surg Res OTSR.</i> 2016 Jun;102(4).                                                                                                                                                              |
| Rafique 2006       | 153 | Rafique A, Ghani S, Sadiq M, Siddiqui IA. Kirschner wire pin tract infection rates between percutaneous and buried wires in treating metacarpal and phalangeal fractures. <i>J Coll Physicians Surg--Pak JCPSP.</i> 2006 Aug;16(8):518–20.                                                                                                                                      |

|                    |     |                                                                                                                                                                                                                                                                                                                                                                       |
|--------------------|-----|-----------------------------------------------------------------------------------------------------------------------------------------------------------------------------------------------------------------------------------------------------------------------------------------------------------------------------------------------------------------------|
| Rajappa 2014       | 154 | Rajappa S, Menon PG, Kumar MM, Raj DG. Early active motion protocol following triple Kessler repair for flexor tendon injury. J Orthop Surg Hong Kong. 2014 Apr;22(1):96–9.                                                                                                                                                                                           |
| Rao 2022           | 155 | Rao V., Akiki R.K., Crozier J.W., Bhatt R.A., Schmidt S.T., Kalliainen L.K. Rethinking the Need for Nail Plate Removal: A Comparison of the Risks Between Standard Nail Bed Repair and Nonoperative Management. Ann Plast Surg. 2022;88(3 Supplement 3):S209–13.                                                                                                      |
| Raza 2021          | 156 | Raza A., Saleem H.M.K., Chaudhry M., Khalid M.U. Radiological and functional outcome of distal radius fracture treated conservatively (mua plaster of paris) vs percutaneous k-wire fixation. Pak J Med Health Sci. 2021;15(8):1842–5.                                                                                                                                |
| Ren 2021           | 157 | Ren J, Lu L, Gao F. The use of the posterior interosseous artery flap and anterolateral thigh flap for post-traumatic soft tissue reconstruction of the hand. Medicine (Baltimore). 2021 Jul 2;100(26):e26517.                                                                                                                                                        |
| Rendon-Medina 2022 | 158 | Rendón-Medina MA, Hanson-Viana E, Mendoza-Vélez M de los A, Vargas-Rocha JM, Rojas-Ortiz JA, Hernandez-Ordoñez R, et al. Comparison of wire versus Nylon in Bonny-Mallet Finger treated with pull-out surgery. Cir Cir. 2022 Dec 1;90(92):023–8.                                                                                                                      |
| Reissner 2012      | 159 | Reissner L, Gienck M, Weishaupt D, Platz A, Kilgus M. [Clinical and radiological results after operative treatment of mallet fracture using Kirschner wire technique]. Handchir Mikrochir Plast Chir Organ Deutschsprachigen Arbeitsgemeinschaft Handchir Organ Deutschsprachigen Arbeitsgemeinschaft Mikrochir Peripher Nerven Gefasse Organ V. 2012 Jan;44(1):11–6. |
| Ridley 2017        | 160 | Ridley TJ, Freking W, Erickson LO, Ward CM. Incidence of Treatment for Infection of Buried Versus Exposed Kirschner Wires in Phalangeal, Metacarpal, and Distal Radial Fractures. J Hand Surg. 2017 Jul;42(7):525–31.                                                                                                                                                 |
| Ring 1997          | 161 | Ring D, Jupiter JB, Brennwald J, Buchler U. Prospective multicenter trial of a plate for dorsal fixation of distal radius fractures. J Hand Surg. 1997;22(5):777–84.                                                                                                                                                                                                  |
| Rocchi 2006        | 162 | Rocchi L, Genitiempo M, Fanfani F. Percutaneous fixation of mallet fractures by the 'umbrella handle' technique. J Hand Surg Edinb Scotl. 2006 Aug;31(4):407–12.                                                                                                                                                                                                      |
| Saied 2019         | 163 | Saied AR, Sabet Jahromi M. Treatment of proximal phalanx fractures: transarticular pinning the metacarpophalangeal joint or cross pinning from the base of the proximal phalanx-a prospective study. Eur J Trauma Emerg Surg Off Publ Eur Trauma Soc. 2019 Aug;45(4):737–43.                                                                                          |
| Saint-Cyr 2006     | 164 | Saint-Cyr M, Miranda D, Gonzalez R, Gupta A. Immediate corticocancellous bone autografting in segmental bone defects of the hand. J Hand Surg Edinb Scotl. 2006 Apr;31(2):168–77.                                                                                                                                                                                     |
| Shakoor 2021       | 165 | Shakoor N., Ahmed U., Nawazish U.A., Ansari H.R., Saddiq S., Aziz A. Functional outcome of closed metacarpal fractures treated with mini fragment plates and screws. Pak J Med Health Sci. 2021;15(10):2609–10.                                                                                                                                                       |
| Shetty 1997        | 166 | Shetty PC, Dicksheet S, Scalea TM. Emergency department repair of hand lacerations using absorbable vicryl sutures. J Emerg Med. 1997;15(5):673–4.                                                                                                                                                                                                                    |
| Sim 2021           | 167 | Sim WP, Ng HJH, Liang BZ, Rajaratnam V. Can Open Hand Injuries Wait for Their Surgery in a Tertiary Hospital?. J Hand Microsurg. 2021;13(3):157–63.                                                                                                                                                                                                                   |
| Singh 2019         | 168 | Singh T, Jayawardhana R, Craigen M, Rajaratnam V. Volar Buttress Plating for Unstable Dorsal Fracture-Dislocations of the Proximal Interphalangeal Joint. J Hand Microsurg. 2019 Aug;11(2):106–10.                                                                                                                                                                    |
| Skochdopole 2022   | 169 | Skochdopole A., Tarabishy S., Hermiz S., Mailey B., Herrera F.A. Open Reduction Internal Fixation of Distal Radius Fractures: Retrospective Cohort Analysis of the Geriatric Population Using the NSQIP Database. Hand N Y N. 2022;17(2):319–25.                                                                                                                      |
| Smith 1988         | 170 | Smith RS, Crick JC, Alonso J, Horowitz M. Open reduction and internal fixation of volar lip fractures of the distal radius. J Orthop Trauma. 1988;2(3):181–7.                                                                                                                                                                                                         |

|                   |     |                                                                                                                                                                                                                                                                                                                                                                                                                                                                                                                                                                                                                                    |
|-------------------|-----|------------------------------------------------------------------------------------------------------------------------------------------------------------------------------------------------------------------------------------------------------------------------------------------------------------------------------------------------------------------------------------------------------------------------------------------------------------------------------------------------------------------------------------------------------------------------------------------------------------------------------------|
| Solari 2021       | 171 | Solari M, Kapur B, Benjamin-Laing H, Klass BR, Cheung G, Brown DJ. Reducing the incidence of pin site infection in hand surgery with the use of a protocol from Ilizarov. <i>J Hand Surg Eur Vol.</i> 2021 Jun;46(5):482–7.                                                                                                                                                                                                                                                                                                                                                                                                        |
| Stahl 2001        | 172 | Stahl S, Schwartz O. Complications of K-wire fixation of fractures and dislocations in the hand and wrist. <i>Arch Orthop Trauma Surg.</i> 2001 Oct;121(9):527–30.                                                                                                                                                                                                                                                                                                                                                                                                                                                                 |
| Starker 1995      | 173 | Starker I, Eaton RG. Kirschner wire placement in the emergency room. Is there a risk? <i>J Hand Surg Edinb Scotl.</i> 1995 Aug;20(4):535–8.                                                                                                                                                                                                                                                                                                                                                                                                                                                                                        |
| Starr 2021        | 174 | Starr B.W., Dembinski D.R., Yuan F., Lax E.A., Yalamanchili S., Megee D.M. Point Blank: A Retrospective Review of Self-inflicted Gunshot Wounds to the Hand. <i>Hand N Y N.</i> 2021;((Starr, Dembinski, Yuan, Lax, Yalamanchili, Megee) University of Cincinnati College of Medicine, OH, United States):15589447211014604.                                                                                                                                                                                                                                                                                                       |
| Stone 1998        | 175 | Stone JF, Davidson JS. The role of antibiotics and timing of repair in flexor tendon injuries of the hand. <i>Ann Plast Surg.</i> 1998 Jan;40(1):7–13.                                                                                                                                                                                                                                                                                                                                                                                                                                                                             |
| Supichyangur 2022 | 176 | Supichyangur K., Tananon T., Sripakdee S.-A., Chunyawongsak V. Prospective Comparison of the Early Outcomes of Headless Compression Screw and Percutaneous K-Wire Fixation in Metacarpal Fractures. <i>J Hand Surg [Internet].</i> 2022;((Supichyangur, Tananon, Sripakdee, Chunyawongsak) Hand and Reconstructive Microsurgery Unit, Department of Orthopedic Surgery, Rajavithi Hospital, College of Medicine, Rangsit University, Bangkok, Thailand). Available from: <a href="http://www.elsevier.com/inca/publications/store/6/2/3/1/4/5/index.htm">http://www.elsevier.com/inca/publications/store/6/2/3/1/4/5/index.htm</a> |
| Suprock 1990      | 177 | Suprock MD, Hood JM, Lubahn JD. Role of antibiotics in open fractures of the finger. <i>J Hand Surg.</i> 1990 Sep;15(5):761–4.                                                                                                                                                                                                                                                                                                                                                                                                                                                                                                     |
| Swanson 1991      | 178 | Swanson TV, Szabo RM, Anderson DD. Open hand fractures: prognosis and classification. <i>J Hand Surg.</i> 1991 Jan;16(1):101–7.                                                                                                                                                                                                                                                                                                                                                                                                                                                                                                    |
| Szalay 2011       | 179 | Szalay G, Schleicher I, Kraus R, Pavlidis T, Schnettler R. [Operative treatment of the mallet fracture using a hook plate]. <i>Handchir Mikrochir Plast Chir Organ Deutschsprachigen Arbeitsgemeinschaft Handchir Organ Deutschsprachigen Arbeitsgemeinschaft Mikrochir Peripher Nerven Gefasse Organ V.</i> 2011 Feb;43(1):46–53.                                                                                                                                                                                                                                                                                                 |
| Tarallo 2013      | 180 | Tarallo L, Mugnai R, Zambianchi F, Adani R, Catani F. Volar plate fixation for the treatment of distal radius fractures: analysis of adverse events. <i>J Orthop Trauma.</i> 2013 Dec;27(12):740–5.                                                                                                                                                                                                                                                                                                                                                                                                                                |
| Tarallo 2020      | 181 | Tarallo L, Giorgini A, Novi M, Zambianchi F, Porcellini G, Catani F. Volar PEEK plate for distal radius fracture: analysis of adverse events. <i>Eur J Orthop Surg Traumatol Orthop Traumatol.</i> 2020 Oct;30(7):1293–8.                                                                                                                                                                                                                                                                                                                                                                                                          |
| Tareen 2019       | 182 | Tareen J, Kaufman AM, Pensy RA, O'Toole RV, Eglseder WA. Timing of treatment of open fractures of the distal radius in patients younger than 65 years. <i>Orthopedics.</i> 2019;42(4):219–25.                                                                                                                                                                                                                                                                                                                                                                                                                                      |
| Terndrup 2018     | 183 | Terndrup M, Jensen T, Kring S, Lindberg-Larsen M. Should we bury K-wires after metacarpal and phalangeal fracture osteosynthesis? <i>Injury.</i> 2018 Jun;49(6):1126–30.                                                                                                                                                                                                                                                                                                                                                                                                                                                           |
| Teunis 2015       | 184 | Teunis T, Mulder F, Nota SP, Milne LW, Dyer GSM, Ring D. No Difference in Adverse Events Between Surgically Treated Reduced and Unreduced Distal Radius Fractures. <i>J Orthop Trauma.</i> 2015 Nov;29(11):521–5.                                                                                                                                                                                                                                                                                                                                                                                                                  |
| Thakur 2021       | 185 | Thakur S.K., Choudhary S.K., Mal J.J.B., Hiremath R.N. Primary bone grafting and k-wire fixation: A preferable option to treat acute unstable scaphoid fracture. <i>Asian J Pharm Clin Res.</i> 2021;14(9):53–6.                                                                                                                                                                                                                                                                                                                                                                                                                   |
| Truntzer 2018     | 186 | Truntzer J, Mertz K, Eppler S, Gardner M, Kamal R, Li K. Complication rates by surgeon type after open treatment of distal radius fractures. <i>Eur J Orthop Surg Traumatol.</i> 2018 Dec;28(8):1543–7.                                                                                                                                                                                                                                                                                                                                                                                                                            |
| Tyllianakis 2010  | 187 | Tyllianakis M, Mylonas S, Saridis A, Kallivokas A, Kouzelis A, Megas P. Treatment of unstable distal radius fractures with Ilizarov circular, nonbridging external fixator. <i>Injury.</i> 2010 Mar;41(3):306–11.                                                                                                                                                                                                                                                                                                                                                                                                                  |

|                  |     |                                                                                                                                                                                                                                                                                                                                                                                                |
|------------------|-----|------------------------------------------------------------------------------------------------------------------------------------------------------------------------------------------------------------------------------------------------------------------------------------------------------------------------------------------------------------------------------------------------|
| Van Leeuwen 2016 | 188 | van Leeuwen WF, van Hoorn BTJA, Chen N, Ring D. Kirschner wire pin site infection in hand and wrist fractures: incidence rate and risk factors. <i>J Hand Surg Eur Vol.</i> 2016 Nov;41(9):990–4.                                                                                                                                                                                              |
| Vasudevan 2017   | 189 | Vasudevan PN, Lohith BM. Management of distal radius fractures - A new concept of closed reduction and standardised percutaneous 5-pin fixation. <i>Trauma.</i> 2018 Apr;20(2):121–30.                                                                                                                                                                                                         |
| Wang W 2021      | 190 | Wang W., Zeng M., Yang J., Wang L., Xie J., Hu Y. Clinical efficacy of closed reduction and percutaneous parallel K-wire interlocking fixation of first metacarpal base fracture. <i>J Orthop Surg.</i> 2021;16(1):454.                                                                                                                                                                        |
| Wang L 2021      | 191 | Wang L., Liu H., Ma T., Wu X., Zhang L. Reconstruction of Soft Tissue Defects in the Hand with a Free Anterolateral Thigh Deep Fascia Flap. <i>Orthop Surg.</i> 2021;13(3):758–67.                                                                                                                                                                                                             |
| Wang H 2021      | 192 | Wang H, Yang XX, Huo YX, Qin HY, Wang W, Wang B, et al. [Clinical effects of ulnar artery perforator chain flaps in repairing wounds on distal forearm or wrist with vascular anastomosis]. <i>Zhonghua Shao Shang Za Zhi Zhonghua Shaoshang Zazhi Chin J Burns.</i> 2021;37(7):635–9.                                                                                                         |
| Wang 2022        | 193 | Wang J., Huang Z., Cueva Jumbo J.C., Sha K. Long-term follow-up of one-stage artificial dermis reconstruction surgery for fingertip defects with exposed phalanx. <i>Hand Surg Rehabil.</i> 2022;41(3):353–61.                                                                                                                                                                                 |
| Wei 2021         | 194 | Wei C., Gu A., Almeida N.D., Bestourous D., Quan T., Fassih S.C., et al. Operation time effect on rates of perioperative complications after operative treatment of distal radius fractures. <i>J Orthop.</i> 2021;24((Wei, Almeida, Bestourous, Quan, Recarey, Malahias) George Washington School of Medicine and Health Sciences, 2300 Eye St NW, Washington, DC 20037, United States):82–5. |
| Weinand 2014     | 195 | Weinand C, Demir E, Lefering R, Juon B, Voegelin E. A comparison of complications in 400 patients after native nail versus silicone nail splints for fingernail splinting after injuries. <i>World J Surg.</i> 2014 Oct;38(10):2574–9.                                                                                                                                                         |
| Werber 2003      | 196 | Werber KD, Brauer RB, Raeder F, Weiss S. External fixation of distal radial fractures: Four compared with five pins a randomized prospective study. <i>J Bone Jt Surg - Ser A.</i> 2003 Apr;85(4):660–6.                                                                                                                                                                                       |
| Whittaker 2005   | 197 | Whittaker JP, Nancarrow JD, Sterne GD. The role of antibiotic prophylaxis in clean incised hand injuries: A prospective randomized placebo controlled double blind trial. <i>J Hand Surg.</i> 2005 May;30(2):162–7.                                                                                                                                                                            |
| Yim 2004         | 198 | Yim KK, Wei FC, Lin CH. A comparison between primary and secondary toe-to-hand transplantation. <i>Plast Reconstr Surg.</i> 2004 Jul;114(1):107–12.                                                                                                                                                                                                                                            |
| Zettl 2009       | 199 | Zettl RP, Clauberg E, Nast-Kolb D, Ruchholtz S, Kühne CA. [Volar locking compression plating versus dorsal plating for fractures of the distal radius: a prospective, randomized study]. <i>Unfallchirurg.</i> 2009 Aug;112(8):712–8.                                                                                                                                                          |
| Zhang 2010       | 200 | Zhang X, Meng H, Shao X, Wen S, Zhu H, Mi X. Pull-out wire fixation for acute mallet finger fractures with k-wire stabilization of the distal interphalangeal joint. <i>J Hand Surg.</i> 2010 Nov;35(11):1864–9.                                                                                                                                                                               |
| Zhou 2008        | 201 | Zhou F, Shen B, Wang R, Fan S, Hu W. [Clinical contrast of percutaneous pinning with plaster splint and open reduction and pulling out wire in the treatment of mallet fingers]. <i>Zhongguo Xiu Fu Chong Jian Wai Ke Za Zhi Zhongguo Xiu Fu Chongjian Waike Zazhi Chin J Reparative Reconstr Surg.</i> 2008 Dec;22(12):1451–4.                                                                |



Supplementary Table 1 - Characteristics of RCTs

| <b>Author Year</b>          | <b>Site</b> | <b>Type</b> | <b>Intervention</b> | <b>Study Type</b> | <b>Study Design</b> | <b>Infection Definition</b> | <b>Risk of Bias</b> | <b>SSI</b> | <b>Total</b> |
|-----------------------------|-------------|-------------|---------------------|-------------------|---------------------|-----------------------------|---------------------|------------|--------------|
| <i>Grossman 1981</i>        | Hand        | Open        | STR                 | Prospective       | RCT                 | Unknown                     | Moderate            | 3          | 265          |
| <i>Peacock 1988</i>         | Hand        | Mixed       | Mixed               | Prospective       | RCT                 | Classification              | High                | 1          | 87           |
| <i>Horton 2003</i>          | Hand        | Closed      | K-wire              | Prospective       | RCT                 | Clinical                    | High                | 6          | 15           |
| <i>Werber 2003</i>          | Wrist       | Closed      | Ex-Fix              | Prospective       | RCT                 | Clinical                    | Moderate            | 6          | 50           |
| <i>Hargreaves 2004</i>      | Wrist       | Closed      | K-wire              | Prospective       | RCT                 | Classification              | High                | 12         | 56           |
| <i>Azzopardi 2005</i>       | Wrist       | Closed      | K-wire              | Prospective       | RCT                 | Clinical                    | High                | 1          | 30           |
| <i>Whittaker 2005</i>       | Mixed       | Open        | STR                 | Prospective       | RCT                 | Classification              | Moderate            | 17         | 157          |
| <i>Egol 2006</i>            | Wrist       | Mixed       | Ex-Fix              | Prospective       | RCT                 | Classification              | High                | 21         | 118          |
| <i>Rafique 2006</i>         | Hand        | Open        | K-wire              | Prospective       | RCT                 | Clinical                    | High                | 12         | 60           |
| <i>Zettl 2009</i>           | Wrist       | Closed      | ORIF                | Prospective       | RCT                 | Clinical                    | High                | 1          | 120          |
| <i>Aydin 2010</i>           | Hand        | Mixed       | Mixed               | Prospective       | RCT                 | Classification              | High                | 24         | 818          |
| <i>Foldhazy 2010</i>        | Wrist       | Closed      | Mixed               | Prospective       | RCT                 | Clinical                    | High                | 4          | 22           |
| <i>Hove 2010</i>            | Wrist       | Closed      | Ex-Fix              | Prospective       | RCT                 | Clinical                    | Moderate            | 19         | 70           |
| <i>Kivi 2011</i>            | Wrist       | Closed      | K-wire              | Prospective       | RCT                 | Clinical                    | High                | 15         | 99           |
| <i>Berwald 2014</i>         | Hand        | Open        | STR                 | Prospective       | RCT                 | Clinical                    | High                | 1          | 73           |
| <i>Costa 2014</i>           | Wrist       | Closed      | Mixed               | Prospective       | RCT                 | Classification              | Low                 | 32         | 461          |
| <i>Chung 2019</i>           | Wrist       | Closed      | Mixed               | Prospective       | RCT                 | Clinical                    | Moderate            | 30         | 183          |
| <i>Dias 2020</i>            | Wrist       | Closed      | K-wire              | Prospective       | RCT                 | Classification              | Low                 | 2          | 203          |
| <i>Lawson 2021</i>          | Wrist       | Closed      | ORIF                | Prospective       | RCT                 | Clinical                    | Low                 | 0          | 80           |
| <i>Maradei-Pereira 2021</i> | Wrist       | Closed      | K-wire              | Prospective       | RCT                 | Classification              | Moderate            | 14         | 220          |
| <i>Mishra 2021</i>          | Wrist       | Closed      | Mixed               | Prospective       | RCT                 | Unknown                     | High                | 3          | 62           |
| <i>Noor 2021</i>            | Hand        | Closed      | Mixed               | Prospective       | RCT                 | Unknown                     | High                | 7          | 56           |
| <i>Costa 2022</i>           | Wrist       | Closed      | K-wire              | Prospective       | RCT                 | Classification              | Low                 | 4          | 245          |
| <i>Khan 2022</i>            | Hand        | Mixed       | K-wire              | Prospective       | RCT                 | Classification              | High                | 21         | 122          |
| <i>Lee 2022</i>             | Mixed       | Open        | STR                 | Prospective       | RCT                 | Clinical                    | High                | 2          | 25           |
| <i>Lundqvist 2022</i>       | Wrist       | Closed      | ORIF                | Prospective       | RCT                 | Clinical                    | High                | 3          | 147          |
| <i>Supichyangur 2022</i>    | Hand        | Closed      | Mixed               | Prospective       | RCT                 | Clinical                    | High                | 1          | 23           |

STR = soft tissue reconstruction, Ex-Fix = external fixation, ORIF = open reduction internal fixation, RCT = randomised control trial

Supplementary Table 2 - Characteristics of Cohort Studies

| <b>Author Year</b>      | <b>Site</b> | <b>Type</b> | <b>Intervention</b> | <b>Study Type</b> | <b>Study Design</b> | <b>Infection Definition</b> | <b>Risk of Bias</b> | <b>SSI</b> | <b>Total</b> |
|-------------------------|-------------|-------------|---------------------|-------------------|---------------------|-----------------------------|---------------------|------------|--------------|
| <i>Suprock 1990</i>     | Hand        | Open        | Mixed               | Prospective       | Cohort              | Clinical                    | High                | 8          | 91           |
| <i>Platt 1995</i>       | Hand        | Open        | Mixed               | Prospective       | Cohort              | Clinical                    | Moderate            | 13         | 124          |
| <i>Shetty 1997</i>      | Hand        | Open        | STR                 | Retrospective     | Cohort              | Clinical                    | High                | 0          | 102          |
| <i>Stone 1998</i>       | Hand        | Open        | STR                 | Retrospective     | Cohort              | Clinical                    | High                | 3          | 140          |
| <i>Goslings 1999</i>    | Wrist       | Mixed       | Ex-Fix              | Prospective       | Cohort              | Clinical                    | Low                 | 9          | 39           |
| <i>Joosten 1999</i>     | Wrist       | Mixed       | Ex-Fix              | Prospective       | Cohort              | Clinical                    | High                | 20         | 174          |
| <i>Lassner 2001</i>     | Hand        | Mixed       | STR                 | Retrospective     | Cohort              | Unknown                     | Moderate            | 3          | 48           |
| <i>Lallemand 2002</i>   | Hand        | Mixed       | ORIF                | Retrospective     | Cohort              | Unknown                     | High                | 1          | 43           |
| <i>Yim 2004</i>         | Hand        | Open        | STR                 | Retrospective     | Cohort              | Clinical                    | Low                 | 2          | 26           |
| <i>Al-Qattan 2005</i>   | Hand        | Mixed       | STR                 | Retrospective     | Cohort              | Clinical                    | Moderate            | 0          | 73           |
| <i>Ahmad 2006</i>       | Hand        | Mixed       | Mixed               | Retrospective     | Cohort              | Clinical                    | High                | 1          | 38           |
| <i>Benson 2006</i>      | Hand        | Open        | Mixed               | Retrospective     | Cohort              | Clinical                    | Moderate            | 7          | 34           |
| <i>Fu 2006</i>          | Wrist       | Mixed       | Ex-Fix              | Prospective       | Cohort              | Clinical                    | Low                 | 1          | 98           |
| <i>Kurzen 2006</i>      | Hand        | Mixed       | ORIF                | Retrospective     | Cohort              | Clinical                    | Moderate            | 3          | 54           |
| <i>McCallister 2006</i> | Hand        | Closed      | STR                 | Prospective       | Cohort              | Clinical                    | Low                 | 2          | 26           |
| <i>Ochman 2006</i>      | Wrist       | Closed      | Ex-Fix              | Retrospective     | Cohort              | Unknown                     | High                | 7          | 67           |
| <i>Zhou 2008</i>        | Hand        | Closed      | Mixed               | Retrospective     | Cohort              | Clinical                    | High                | 3          | 72           |
| <i>Egol 2010</i>        | Wrist       | Mixed       | Mixed               | Retrospective     | Cohort              | Unknown                     | High                | 0          | 44           |
| <i>Gereli 2010</i>      | Wrist       | Mixed       | Mixed               | Retrospective     | Cohort              | Clinical                    | High                | 3          | 30           |
| <i>Lattman 2011</i>     | Wrist       | Closed      | Mixed               | Prospective       | Cohort              | Unknown                     | High                | 1          | 245          |
| <i>Nygaard 2011</i>     | Hand        | Mixed       | Mixed               | Retrospective     | Cohort              | Clinical                    | High                | 24         | 51           |
| <i>Al-Qattan 2012</i>   | Hand        | Open        | Mixed               | Retrospective     | Cohort              | Clinical                    | Moderate            | 2          | 36           |
| <i>Faruqui 2012</i>     | Hand        | Closed      | K-wire              | Retrospective     | Cohort              | Clinical                    | High                | 1          | 50           |
| <i>Mehdinasab 2012</i>  | Hand        | Open        | STR                 | Prospective       | Cohort              | Unknown                     | High                | 0          | 32           |
| <i>Ghosh 2013</i>       | Hand        | Open        | K-wire              | Prospective       | Cohort              | Clinical                    | High                | 4          | 30           |
| <i>Kim 2013</i>         | Wrist       | Mixed       | ORIF                | Retrospective     | Cohort              | Clinical                    | Moderate            | 3          | 60           |
| <i>Frueh 2014</i>       | Hand        | Open        | STR                 | Retrospective     | Cohort              | Clinical                    | High                | 1          | 191          |
| <i>Lutz 2014</i>        | Wrist       | Mixed       | K-wire              | Prospective       | Cohort              | Unknown                     | Moderate            | 16         | 129          |



|                          |       |        |        |               |        |                |          |     |       |
|--------------------------|-------|--------|--------|---------------|--------|----------------|----------|-----|-------|
| <i>Weinand 2014</i>      | Hand  | Open   | STR    | Retrospective | Cohort | Clinical       | Moderate | 67  | 401   |
| <i>Lauder 2015</i>       | Wrist | Mixed  | ORIF   | Prospective   | Cohort | Unknown        | High     | 0   | 18    |
| <i>Miao 2015</i>         | Hand  | Closed | Ex-Fix | Prospective   | Cohort | Unknown        | High     | 6   | 41    |
| <i>Teunis 2015</i>       | Wrist | Closed | ORIF   | Retrospective | Cohort | Clinical       | Low      | 11  | 1511  |
| <i>Van Leeuwen 2016</i>  | Mixed | Open   | K-wire | Retrospective | Cohort | Clinical       | Low      | 85  | 1213  |
| <i>Basat 2017</i>        | Hand  | Open   | Mixed  | Retrospective | Cohort | Clinical       | Moderate | 9   | 61    |
| <i>Donnally 2017</i>     | Mixed | Mixed  | Mixed  | Retrospective | Cohort | Clinical       | High     | 6   | 41    |
| <i>Jose 2017</i>         | Wrist | Closed | ORIF   | Prospective   | Cohort | Clinical       | High     | 1   | 53    |
| <i>Ridley 2017</i>       | Mixed | Open   | K-wire | Retrospective | Cohort | Clinical       | Low      | 99  | 695   |
| <i>Nguyen 2018</i>       | Hand  | Open   | STR    | Retrospective | Cohort | Clinical       | High     | 0   | 30    |
| <i>Terndrup 2018</i>     | Hand  | Closed | K-wire | Retrospective | Cohort | Clinical       | Low      | 21  | 444   |
| <i>Truntzer 2018</i>     | Wrist | Closed | ORIF   | Retrospective | Cohort | Clinical       | Low      | 154 | 7890  |
| <i>Lutsky 2019</i>       | Mixed | Mixed  | K-wire | Prospective   | Cohort | Classification | Low      | 17  | 141   |
| <i>Minhas 2019</i>       | Hand  | Mixed  | Mixed  | Retrospective | Cohort | Clinical       | Low      | 31  | 3506  |
| <i>Ornelli 2019</i>      | Hand  | Mixed  | STR    | Retrospective | Cohort | Unknown        | High     | 0   | 12    |
| <i>Saied 2019</i>        | Hand  | Closed | K-wire | Prospective   | Cohort | Clinical       | High     | 2   | 61    |
| <i>Tareen 2019</i>       | Wrist | Open   | Mixed  | Retrospective | Cohort | Clinical       | High     | 14  | 92    |
| <i>Davies 2020</i>       | Hand  | Open   | Mixed  | Prospective   | Cohort | Clinical       | Low      | 41  | 983   |
| <i>Henry 2020</i>        | Wrist | Open   | ORIF   | Retrospective | Cohort | Unknown        | High     | 0   | 24    |
| <i>Lee 2020</i>          | Wrist | Mixed  | ORIF   | Retrospective | Cohort | Clinical       | Low      | 85  | 1921  |
| <i>Liu Y 2020</i>        | Wrist | Mixed  | Ex-Fix | Retrospective | Cohort | Unknown        | High     | 15  | 207   |
| <i>Al-Shahwanii 2021</i> | Wrist | Closed | Mixed  | Prospective   | Cohort | Clinical       | High     | 5   | 26    |
| <i>Baldwin 2021</i>      | Mixed | Mixed  | Mixed  | Retrospective | Cohort | Classification | Low      | 20  | 556   |
| <i>Baumgartner 2021</i>  | Hand  | Closed | ORIF   | Retrospective | Cohort | Clinical       | Moderate | 0   | 79    |
| <i>Bennur 2021</i>       | Wrist | Closed | Mixed  | Prospective   | Cohort | Clinical       | High     | 6   | 80    |
| <i>Chul-Ho 2021</i>      | Hand  | Closed | K-wire | Retrospective | Cohort | Unknown        | Moderate | 1   | 25    |
| <i>Feldman 2021</i>      | Hand  | Mixed  | Mixed  | Retrospective | Cohort | Clinical       | Moderate | 7   | 107   |
| <i>Galivanche 2021</i>   | Wrist | Mixed  | ORIF   | Retrospective | Cohort | Clinical       | Low      | 383 | 16990 |
| <i>Gumussuyu 2021</i>    | Hand  | Closed | K-wire | Retrospective | Cohort | Clinical       | Moderate | 1   | 21    |
| <i>Johnson 2021</i>      | Mixed | Open   | Mixed  | Retrospective | Cohort | Clinical       | High     | 2   | 89    |

STR = soft tissue reconstruction, Ex-Fix = external fixation, ORIF = open reduction internal fixation

|                         |       |        |        |               |        |                |          |     |        |
|-------------------------|-------|--------|--------|---------------|--------|----------------|----------|-----|--------|
| <i>Jokhio 2021</i>      | Wrist | Closed | ORIF   | Prospective   | Cohort | Clinical       | High     | 1   | 200    |
| <i>Langridge 2021</i>   | Hand  | Closed | Mixed  | Retrospective | Cohort | Clinical       | Moderate | 3   | 49     |
| <i>Levy 2021</i>        | Mixed | Mixed  | K-wire | Retrospective | Cohort | Clinical       | Moderate | 0   | 90     |
| <i>Liu 2021</i>         | Hand  | Open   | STR    | Retrospective | Cohort | Clinical       | Moderate | 5   | 24     |
| <i>Liu Q 2021</i>       | Hand  | Open   | STR    | Retrospective | Cohort | Unknown        | High     | 5   | 24     |
| <i>Meaike 2021</i>      | Wrist | Closed | ORIF   | Retrospective | Cohort | Unknown        | High     | 0   | 115    |
| <i>Raza 2021</i>        | Wrist | Closed | K-wire | Retrospective | Cohort | Unknown        | High     | 5   | 50     |
| <i>Shakoor 2021</i>     | Hand  | Closed | ORIF   | Prospective   | Cohort | Unknown        | High     | 3   | 16     |
| <i>Sim 2021</i>         | Mixed | Open   | Mixed  | Retrospective | Cohort | Clinical       | Moderate | 3   | 232    |
| <i>Starr 2021</i>       | Hand  | Open   | Mixed  | Retrospective | Cohort | Clinical       | Low      | 2   | 27     |
| <i>Thakur 2021</i>      | Wrist | Closed | ORIF   | Prospective   | Cohort | Unknown        | High     | 0   | 21     |
| <i>Wang 2021</i>        | Hand  | Mixed  | STR    | Retrospective | Cohort | Unknown        | Moderate | 0   | 6      |
| <i>Wang 2021</i>        | Wrist | Open   | STR    | Retrospective | Cohort | Clinical       | High     | 0   | 11     |
| <i>Wei 2021</i>         | Wrist | Mixed  | Mixed  | Retrospective | Cohort | Classification | Moderate | 57  | 39275  |
| <i>Ahmad 2022</i>       | Wrist | Closed | Mixed  | Retrospective | Cohort | Clinical       | Moderate | 6   | 190    |
| <i>Constantine 2022</i> | Wrist | Mixed  | Mixed  | Retrospective | Cohort | Clinical       | Moderate | 781 | 87169  |
| <i>Hery 2022</i>        | Hand  | Open   | Mixed  | Prospective   | Cohort | Classification | Moderate | 5   | 405    |
| <i>Kadhun 2022</i>      | Mixed | Open   | STR    | Retrospective | Cohort | Clinical       | High     | 7   | 151    |
| <i>Li 2022</i>          | Hand  | Mixed  | Mixed  | Retrospective | Cohort | Clinical       | High     | 1   | 70     |
| <i>Mahmood 2022</i>     | Wrist | Closed | ORIF   | Retrospective | Cohort | Clinical       | Moderate | 456 | 132650 |
| <i>Michael 2022</i>     | Wrist | Mixed  | Ex-Fix | Prospective   | Cohort | Clinical       | Moderate | 3   | 32     |
| <i>Rao 2022</i>         | Hand  | Open   | STR    | Retrospective | Cohort | Clinical       | Moderate | 0   | 78     |
| <i>Skochdopole 2022</i> | Wrist | Closed | ORIF   | Retrospective | Cohort | Unknown        | Moderate | 13  | 5894   |

Supplementary Table 3 - Characteristics of Case Control Studies

| <b>Author Year</b> | <b>Site</b> | <b>Type</b> | <b>Intervention</b> | <b>Study Type</b> | <b>Study Design</b> | <b>Infection Definition</b> | <b>Risk of Bias</b> | <b>SSI</b> | <b>Total</b> |
|--------------------|-------------|-------------|---------------------|-------------------|---------------------|-----------------------------|---------------------|------------|--------------|
| <i>Bednar 2004</i> | Wrist       | Closed      | Ex-Fix              | Retrospective     | Case control        | Clinical                    | High                | 2          | 12           |
| <i>Dwyer 2017</i>  | Wrist       | Closed      | Mixed               | Retrospective     | Case control        | Unknown                     | High                | 6          | 25           |

Ex-Fix = external fixation

Supplementary Table 4 - Characteristics of Case Series

| <b>Author Year</b>    | <b>Site</b> | <b>Type</b> | <b>Intervention</b> | <b>Study Type</b> | <b>Study Design</b> | <b>Infection Definition</b> | <b>Risk of Bias</b> | <b>SSI</b> | <b>Total</b> |
|-----------------------|-------------|-------------|---------------------|-------------------|---------------------|-----------------------------|---------------------|------------|--------------|
| <i>Conolly 1973</i>   | Hand        | Mixed       | Mixed               | Retrospective     | Case series         | Clinical                    | High                | 18         | 260          |
| <i>Marshall 1978</i>  | Hand        | Open        | STR                 | Retrospective     | Case series         | Unknown                     | High                | 0          | 7            |
| <i>Grundberg 1981</i> | Hand        | Mixed       | ORIF                | Retrospective     | Case series         | Unknown                     | High                | 0          | 21           |
| <i>Adkison 1982</i>   | Wrist       | Mixed       | Mixed               | Retrospective     | Case series         | Clinical                    | High                | 1          | 54           |
| <i>Smith 1988</i>     | Wrist       | Closed      | ORIF                | Retrospective     | Case series         | Clinical                    | Moderate            | 0          | 16           |
| <i>Swanson 1991</i>   | Hand        | Closed      | Mixed               | Retrospective     | Case series         | Clinical                    | Moderate            | 7          | 117          |
| <i>Botte 1992</i>     | Mixed       | Closed      | K-wire              | Retrospective     | Case series         | Clinical                    | Moderate            | 10         | 137          |
| <i>Duncan 1993</i>    | Hand        | Closed      | Mixed               | Retrospective     | Case series         | Clinical                    | Moderate            | 6          | 75           |
| <i>Eglseder 1993</i>  | Wrist       | Mixed       | Ex-Fix              | Retrospective     | Case series         | Clinical                    | High                | 0          | 19           |
| <i>Starker 1995</i>   | Hand        | Open        | K-wire              | Prospective       | Case series         | Clinical                    | High                | 0          | 68           |
| <i>Hove 1997</i>      | Wrist       | Closed      | Ex-Fix              | Retrospective     | Case series         | Unknown                     | High                | 1          | 29           |
| <i>Lopes 1997</i>     | Wrist       | Closed      | ORIF                | Retrospective     | Case series         | Unknown                     | High                | 1          | 19           |
| <i>Ring 1997</i>      | Wrist       | Closed      | ORIF                | Prospective       | Case series         | Clinical                    | Moderate            | 0          | 22           |
| <i>Page 1998</i>      | Hand        | Open        | ORIF                | Retrospective     | Case series         | Clinical                    | Moderate            | 3          | 82           |
| <i>Bauze 1999</i>     | Hand        | Closed      | ORIF                | Retrospective     | Case series         | Clinical                    | Moderate            | 2          | 10           |
| <i>Ignacio 1999</i>   | Wrist       | Mixed       | Ex-Fix              | Prospective       | Case series         | Unknown                     | High                | 5          | 25           |
| <i>Stahl 2001</i>     | Mixed       | Open        | K-wire              | Retrospective     | Case series         | Clinical                    | Moderate            | 13         | 236          |
| <i>Bhat 2002</i>      | Hand        | Open        | K-wire              | Retrospective     | Case series         | Clinical                    | High                | 11         | 120          |
| <i>Akmaz 2003</i>     | Wrist       | Mixed       | Ex-Fix              | Retrospective     | Case series         | Clinical                    | High                | 4          | 25           |
| <i>Lee 2003</i>       | Wrist       | Closed      | ORIF                | Retrospective     | Case series         | Clinical                    | Moderate            | 1          | 22           |
| <i>Anderson 2004</i>  | Wrist       | Mixed       | Ex-Fix              | Retrospective     | Case series         | Clinical                    | Moderate            | 9          | 24           |
| <i>Gradl 2005</i>     | Wrist       | Closed      | Ex-Fix              | Prospective       | Case series         | Clinical                    | Low                 | 3          | 25           |
| <i>Kömürcü 2005</i>   | Wrist       | Mixed       | Ex-Fix              | Retrospective     | Case series         | Clinical                    | Moderate            | 4          | 24           |
| <i>Bach 2006</i>      | Hand        | Open        | ORIF                | Retrospective     | Case series         | Clinical                    | Moderate            | 0          | 10           |
| <i>Rocchi 2006</i>    | Hand        | Closed      | K-wire              | Retrospective     | Case series         | Clinical                    | Moderate            | 1          | 48           |
| <i>Saint-Cyr 2006</i> | Hand        | Open        | ORIF                | Retrospective     | Case series         | Clinical                    | Moderate            | 0          | 7            |
| <i>Ali 2007</i>       | Hand        | Mixed       | Mixed               | Prospective       | Case series         | Clinical                    | High                | 5          | 94           |
| <i>Dennison 2007</i>  | Wrist       | Closed      | ORIF                | Retrospective     | Case series         | Clinical                    | Moderate            | 0          | 5            |

|                         |       |        |        |               |             |          |          |    |     |
|-------------------------|-------|--------|--------|---------------|-------------|----------|----------|----|-----|
| <i>Dumont 2007</i>      | Hand  | Closed | ORIF   | Retrospective | Case series | Clinical | High     | 0  | 12  |
| <i>Al-Qattan 2008</i>   | Hand  | Closed | ORIF   | Prospective   | Case series | Clinical | Moderate | 0  | 15  |
| <i>Henry 2008</i>       | Hand  | Mixed  | STR    | Retrospective | Case series | Clinical | Moderate | 7  | 108 |
| <i>Nazerani 2009</i>    | Hand  | Open   | STR    | Retrospective | Case series | Unknown  | Moderate | 0  | 24  |
| <i>Anakwe 2010</i>      | Wrist | Closed | ORIF   | Prospective   | Case series | Clinical | Moderate | 0  | 21  |
| <i>Tyllianakis 2010</i> | Wrist | Open   | Ex-Fix | Retrospective | Case series | Clinical | Moderate | 7  | 20  |
| <i>Zhang 2010</i>       | Hand  | Closed | K-wire | Prospective   | Case series | Clinical | Low      | 0  | 65  |
| <i>Al-Qattan 2011</i>   | Hand  | Closed | K-wire | Retrospective | Case series | Clinical | Low      | 4  | 35  |
| <i>Campochiaro 2011</i> | Wrist | Closed | Mixed  | Retrospective | Case series | Clinical | Moderate | 0  | 77  |
| <i>Capo 2011</i>        | Hand  | Open   | Mixed  | Retrospective | Case series | Clinical | Moderate | 2  | 102 |
| <i>Chafik 2011</i>      | Hand  | Closed | K-wire | Prospective   | Case series | Clinical | High     | 5  | 24  |
| <i>Nazerani 2011</i>    | Hand  | Mixed  | STR    | Retrospective | Case series | Unknown  | High     | 4  | 64  |
| <i>Szalay 2011</i>      | Hand  | Closed | ORIF   | Retrospective | Case series | Clinical | Low      | 0  | 77  |
| <i>Cheah 2012</i>       | Hand  | Closed | ORIF   | Retrospective | Case series | Clinical | Moderate | 0  | 13  |
| <i>Marsland 2012</i>    | Hand  | Closed | Ex-Fix | Retrospective | Case series | Clinical | High     | 3  | 8   |
| <i>Reissner 2012</i>    | Hand  | Closed | K-wire | Retrospective | Case series | Clinical | Low      | 5  | 32  |
| <i>An 2013</i>          | Hand  | Closed | K-wire | Retrospective | Case series | Clinical | High     | 0  | 27  |
| <i>Hussain 2013</i>     | Hand  | Open   | STR    | Retrospective | Case series | Unknown  | High     | 0  | 113 |
| <i>Mattiassich 2013</i> | Hand  | Closed | K-wire | Retrospective | Case series | Unknown  | Moderate | 4  | 26  |
| <i>Tarallo 2013</i>     | Wrist | Closed | ORIF   | Retrospective | Case series | Clinical | Moderate | 1  | 303 |
| <i>Aigner 2014</i>      | Wrist | Mixed  | Mixed  | Retrospective | Case series | Clinical | Moderate | 6  | 721 |
| <i>Boussakri 2014</i>   | Hand  | Closed | K-wire | Retrospective | Case series | Clinical | High     | 3  | 28  |
| <i>Rajappa 2014</i>     | Mixed | Open   | STR    | Prospective   | Case series | Clinical | Moderate | 1  | 26  |
| <i>Brei-Thoma 2015</i>  | Hand  | Closed | ORIF   | Retrospective | Case series | Clinical | Moderate | 0  | 32  |
| <i>de Haseth 2015</i>   | Hand  | Closed | K-wire | Retrospective | Case series | Clinical | Moderate | 1  | 9   |
| <i>Erken 2015</i>       | Hand  | Open   | STR    | Retrospective | Case series | Unknown  | Moderate | 0  | 12  |
| <i>Kilic 2015</i>       | Hand  | Open   | STR    | Retrospective | Case series | Clinical | High     | 21 | 67  |
| <i>Matullo 2015</i>     | Wrist | Mixed  | ORIF   | Retrospective | Case series | Unknown  | Moderate | 1  | 21  |
| <i>Pelissier 2015</i>   | Hand  | Closed | K-wire | Retrospective | Case series | Clinical | Moderate | 4  | 86  |
| <i>Fan 2016</i>         | Wrist | Mixed  | ORIF   | Retrospective | Case series | Unknown  | High     | 0  | 12  |

STR = soft tissue reconstruction, Ex-Fix = external fixation, ORIF = open reduction internal fixation

|                           |       |        |        |               |             |          |          |    |     |
|---------------------------|-------|--------|--------|---------------|-------------|----------|----------|----|-----|
| <i>Li C 2016</i>          | Hand  | Closed | ORIF   | Prospective   | Case series | Unknown  | Low      | 0  | 66  |
| <i>Li S 2016</i>          | Hand  | Mixed  | K-wire | Retrospective | Case series | Unknown  | Moderate | 0  | 16  |
| <i>Parmaksizoglu 2016</i> | Hand  | Open   | STR    | Retrospective | Case series | Clinical | Moderate | 0  | 3   |
| <i>Prunieres 2016</i>     | Hand  | Open   | K-wire | Prospective   | Case series | Clinical | High     | 0  | 12  |
| <i>Rabarin 2016</i>       | Hand  | Open   | STR    | Retrospective | Case series | Clinical | Moderate | 0  | 28  |
| <i>Johandi 2017</i>       | Wrist | Mixed  | STR    | Retrospective | Case series | Unknown  | Moderate | 1  | 12  |
| <i>Vasudevan 2017</i>     | Wrist | Closed | K-wire | Retrospective | Case series | Clinical | Moderate | 52 | 458 |
| <i>Ficke 2018</i>         | Wrist | Mixed  | ORIF   | Retrospective | Case series | Clinical | Moderate | 5  | 47  |
| <i>Huang 2018</i>         | Wrist | Mixed  | ORIF   | Retrospective | Case series | Unknown  | Low      | 0  | 24  |
| <i>Guerro 2019</i>        | Hand  | Mixed  | ORIF   | Retrospective | Case series | Clinical | Low      | 2  | 23  |
| <i>Kucukguven 2019</i>    | Hand  | Open   | STR    | Prospective   | Case series | Unknown  | Low      | 4  | 23  |
| <i>Singh 2019</i>         | Hand  | Closed | ORIF   | Retrospective | Case series | Clinical | Moderate | 1  | 11  |
| <i>Abouelela 2020</i>     | Hand  | Closed | K-wire | Retrospective | Case series | Clinical | Moderate | 1  | 33  |
| <i>Afshar 2020</i>        | Hand  | Closed | ORIF   | Prospective   | Case series | Clinical | Low      | 0  | 21  |
| <i>Cheng 2020</i>         | Wrist | Closed | K-wire | Retrospective | Case series | Clinical | Low      | 2  | 17  |
| <i>Kural 2020</i>         | Hand  | Closed | Mixed  | Retrospective | Case series | Clinical | High     | 0  | 11  |
| <i>Pan 2020</i>           | Hand  | Open   | STR    | Prospective   | Case series | Clinical | High     | 0  | 17  |
| <i>Tarallo 2020</i>       | Wrist | Closed | ORIF   | Retrospective | Case series | Clinical | Low      | 1  | 110 |
| <i>Abulsoud 2021</i>      | Hand  | Closed | K-wire | Prospective   | Case series | Unknown  | Moderate | 0  | 23  |
| <i>Beeres 2021</i>        | Wrist | Mixed  | ORIF   | Retrospective | Case series | Clinical | High     | 0  | 12  |
| <i>Camacho 2021</i>       | Hand  | Mixed  | ORIF   | Retrospective | Case series | Unknown  | High     | 0  | 45  |
| <i>Martins 2021</i>       | Hand  | Open   | STR    | Retrospective | Case series | Unknown  | High     | 0  | 37  |
| <i>Meena 2021</i>         | Wrist | Mixed  | ORIF   | Retrospective | Case series | Clinical | High     | 2  | 25  |
| <i>Solari 2021</i>        | Hand  | Closed | K-wire | Retrospective | Case series | Clinical | Low      | 9  | 200 |
| <i>Wang 2021</i>          | Hand  | Closed | K-wire | Retrospective | Case series | Unknown  | Low      | 0  | 20  |
| <i>Wang 2021</i>          | Hand  | Closed | K-wire | Retrospective | Cohort      | Unknown  | High     | 0  | 20  |
| <i>Arora 2022</i>         | Wrist | Closed | ORIF   | Retrospective | Case series | Clinical | Moderate | 1  | 28  |
| <i>Choubey 2022</i>       | Wrist | Closed | ORIF   | Prospective   | Case series | Clinical | Moderate | 1  | 28  |
| <i>Ibrahim 2022</i>       | Mixed | Open   | Mixed  | Retrospective | Case series | Clinical | High     | 0  | 17  |
| <i>Joo 2022</i>           | Wrist | Open   | ORIF   | Retrospective | Case series | Clinical | High     | 2  | 24  |

|                     |       |        |        |               |             |          |          |   |    |
|---------------------|-------|--------|--------|---------------|-------------|----------|----------|---|----|
| <i>Liechti 2022</i> | Wrist | Closed | ORIF   | Prospective   | Case series | Clinical | Low      | 0 | 28 |
| <i>Naguib 2022</i>  | Hand  | Closed | Ex-Fix | Prospective   | Case series | Clinical | Low      | 1 | 20 |
| <i>Wang 2022</i>    | Hand  | Open   | STR    | Retrospective | Case series | Clinical | Moderate | 0 | 24 |
